# Differential role of melatonin in healthy brain aging: a systematic review and meta-analysis of the SAMP8 model

Dewan Md. Sumsuzzman<sup>1,2,3,4</sup>, Zeeshan Ahmad Khan<sup>2,3,4,\*</sup>, Jeonghyun Choi<sup>2,3,4,\*</sup>, Yonggeun Hong<sup>1,2,3,4,5</sup>

<sup>1</sup>Department of Rehabilitation Science, Graduate School of Inje University, Gimhae 50834, Korea

<sup>2</sup>Biohealth Products Research Center (BPRC), Inje University, Gimhae 50834, Korea

<sup>3</sup>Ubiquitous Healthcare and Anti-Aging Research Center (u-HARC), Inje University, Gimhae 50834, Korea

<sup>4</sup>Department of Physical Therapy, College of Healthcare Medical Science and Engineering, Gimhae 50834, Korea

<sup>5</sup>Department of Medicine, Division of Hematology/Oncology, Harvard Medical School-Beth Israel Deaconess Medical Center, Boston, MA 02215, USA

\*Equal contribution

**Correspondence to:** Yonggeun Hong; email: [yonghong@inje.ac.kr](mailto:yonghong@inje.ac.kr)

**Keywords:** melatonin, brain aging, oxidative stress, senescence, meta-analysis

**Received:** December 28, 2020

**Accepted:** March 14, 2021

**Published:** April 2, 2021

**Copyright:** © 2021 Sumsuzzman et al. This is an open access article distributed under the terms of the [Creative Commons Attribution License](https://creativecommons.org/licenses/by/3.0/) (CC BY 3.0), which permits unrestricted use, distribution, and reproduction in any medium, provided the original author and source are credited.

## ABSTRACT

The relationship between oxidative stress (OS) and cellular senescence (CS) is an important research topic because of the rapidly aging global population. Melatonin (MT) is associated with aging and plays a pivotal role in redox homeostasis, but its role in maintaining physiological stability in the brain (especially in OS-induced senescence) remains elusive. Here, we systematically reviewed the differential role of MT on OS-induced senescence in the SAMP8 mouse model. Major electronic databases were searched for relevant studies. Pooled mean differences (MDs)/standardized mean differences (SMDs) with 95% confidence intervals (CIs) were calculated to estimate the effect size. Overall, 10 studies met the inclusion criteria. MT treatment was associated with the reduction of lipid peroxidation (SMD = -2.00, 95% CI [-2.91, -1.10];  $p < 0.0001$ ) and carbonylated protein (MD = -5.74, 95% CI [-11.03, -0.44];  $p = 0.03$ ), and with enhancement of the reduced-glutathione/oxidized-glutathione ratio (MD = 1.12, 95% CI [0.77, 1.47];  $p < 0.00001$ ). No differences were found in catalase and superoxide dismutase activities between MT-treated and vehicle-treated groups. Furthermore, nuclear-factor- $\kappa$ B, cyclin-dependent kinase-5, and p53 were regulated by MT administration. MT may improve physiological stability during aging by regulating interactions in brain senescence, but acts differentially on the antioxidant system.

## INTRODUCTION

Aging is the greatest risk factor for nearly all diseases and is an important global healthcare challenge as the older adult group (age  $\geq 60$  years) is growing faster than younger age groups [1, 2]. Because of the considerable impact of aging on the overall population, research on healthy aging has become a common focus worldwide. Consequently, the publication frequency regarding aging has steadily increased in recent years (Figure 1).

Recently, several hallmarks of aging have been identified. Of these, cellular senescence (CS) is an important topic in scientific research regarding aging processes [3, 4]. Disruption of redox homeostasis due to prolonged exposure to oxidative stress (OS), manifested as reactive oxygen species (ROS)-mediated damage to biomolecules, has been identified as a crucial mediator for the progression of CS [5–9]. Although selective elimination of senescent cells (via senolytics) and prevention/slowed progression of senescence features

(via senostatics) are attractive strategies, they also have undesirable adverse-effects such as high toxicity, low bioavailability, and chemical instability [10–12]. Therefore, the roles of biomolecules in maintenance of physiological homeostasis between OS and CS may provide novel strategies to promote healthy aging.

During the aging process, the brain is presumably the organ most prone to free radical damage because of its high oxygen utilization, high concentrations of polyunsaturated fatty acids, and low concentrations of cytosolic antioxidants [13]. Lipid peroxidation (LPO) is oxidative damage to lipids induced by ROS, whose reaction with polyunsaturated fatty acids in cell membranes has been proposed as a critical mechanism involved in cellular aging [14]. Moreover, protein carbonylation is an irreversible oxidative protein modification process in cells, organelles, and tissues, which increases with age [15]. Its aggregation can become toxic to living cells and has been directly linked to a large number of age-related disorders [15, 16]. Besides, cathepsin-B (lysosomal thiol proteases) expression increases proportionally with age and its subcellular distribution is apparently altered, thus resulting in elevated production of mitochondria-mediated ROS [17]. Furthermore, the activation of several signaling pathways, including those of nuclear factor- $\kappa$ B (NF- $\kappa$ B), cyclin-dependent kinase 5 (Cdk5), and p53, play pivotal roles in the promotion of OS-induced CS [18–20]. Taken together, these findings have significant implications for the understanding of how age-related induction of OS is directly linked with

premature senescence (i.e., stress-induced premature senescence).

The senescence-accelerated mouse prone 8 (SAMP8) strain is an excellent mammalian model to study OS-induced senescence-related impairments and degeneration in the brain [21–24]. The overexpression of alpha-synuclein together with phosphorylated tau protein significantly reduces antioxidant machinery in SAMP8 [25–27], indicating that OS may contribute to senescence-dependent brain impairments. Importantly, the SAMP8 mouse model expresses premature senescence and has features similar to those of aged humans, such as shortened lifespan and diminished physical activity [28]. The SAMP8 also exhibits age-related deterioration of learning and memory [29, 30], as well as key pathological features that induce premature senescence, including OS [29, 31]. The SAMP8 mouse is a natural aging animal model, rather than a transgenic model of aging or age-related diseases. This suggests that underlying mechanisms must be linked to premature senescence and more closely represent the complex multifactorial nature of aging. Furthermore, the lifespan of SAMP8 mice (10–17 months) is significantly shorter than that of normal laboratory mice (22–36 months) [32, 33]. Therefore, SAMP8 mice provide the best alternative aging research model in terms of time and cost.

Melatonin (MT), an endocrine hormone of the pineal gland, can directly scavenge free radicals and was previously identified as a potent antioxidant [34–37].

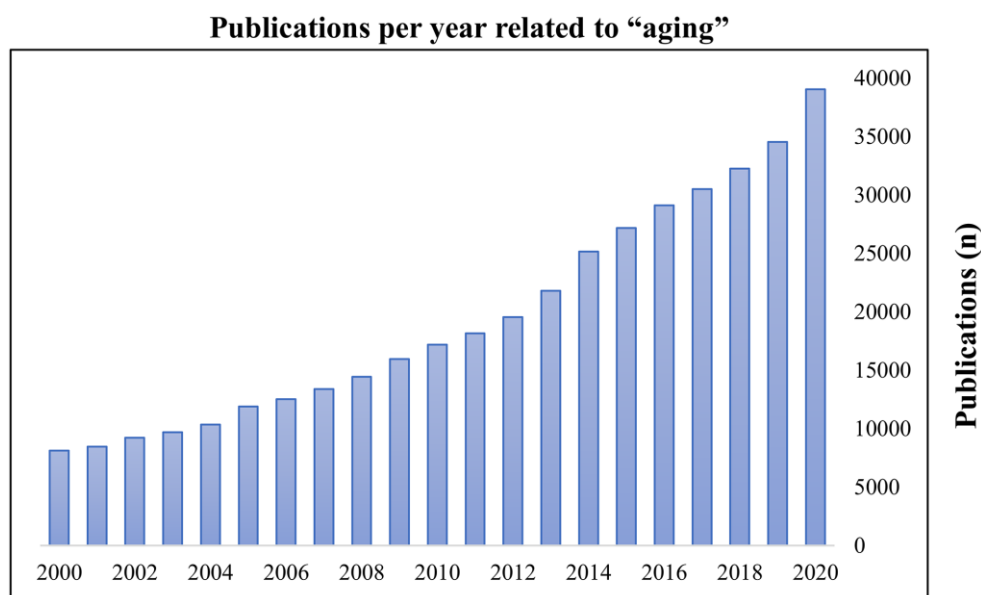

**Figure 1. Publications per year related to ‘aging’.** The search term ‘aging’ was entered on PubMed on 16 November 2020. Results were plotted as publications per year.

MT also stimulates antioxidative enzymes such as superoxide dismutase (SOD) and glutathione peroxidase (GPx); this action further diminishes the cellular oxidation state [34, 38]. A previous study demonstrated that oral administration of MT to SAMP mice was protective against age-related oxidative DNA damage in the brain [39]. Another study revealed that MT treatment inhibited age-related increases in both LPO and protein oxidation in SAMP8 mice [40]. Although many studies have demonstrated the protective effects of MT in several aging animal models, the mechanism underlying the effects of MT in SAMP8 mice remains unclear. Furthermore, a systematic review of the literature and meta-analysis of preclinical data can demonstrate the quality and strength of existing research. However, no such study has yet been conducted to evaluate the efficacy of MT in the SAMP8 mouse model. Thus, this systematic review assessed previous research concerning the protective effect of MT against brain aging in the SAMP8 mouse model. This analysis is intended to provide evidence to support the therapeutic potential of MT to promote healthy aging and prevent age-related diseases by maintenance of physiological homeostasis between OS and CS.

## RESULTS

### Study search and selection

In total, 880 studies were found through an electronic database search. After removal of duplicate studies, the titles and abstracts of 719 potentially relevant articles were screened. Of these, 701 were excluded based on title and abstract screening. The remaining 18 studies were included in the full-text screening. Of these, eight studies were excluded for the following reasons: unavailable data ( $n = 1$ ), review article format ( $n = 1$ ), inappropriate study organ ( $n = 1$ ), inappropriate study design ( $n = 1$ ), inappropriate animal model ( $n = 2$ ), unrelated outcome ( $n = 1$ ), and *ex vivo* design ( $n = 1$ ). Finally, 10 studies [40–49] fulfilled the eligibility criteria and were selected for systematic review and meta-analysis (Figure 2).

### Study characteristics

The main characteristics of the studies that assessed the effect of MT in the SAMP8 model are reported in Table 1. These studies were published between 2002 and 2011. In nine of the 10 included studies, MT was administered in the drinking water at a dose of 10 mg/kg/day. In the remaining study, MT was administered at a dose of 1 mg/kg/day subcutaneously [45]. Eight studies administered MT when animals were 2–10 months of age [41–44, 46–49], one study administered MT when animals were 7–12 months of

age [40], and the remaining one study divided into mice into two MT treatment groups based on age (group 1: 4–8 months; group 2: 7–11 months) [45]. Five studies included both male and female mice [40–42, 48, 49], and three of these reported sex-specific results [41, 42, 48]. Three studies used only male mice [43, 45, 46] and the remaining two studies did not report animal sex [44, 47].

### Risk of bias and quality of reporting

The abridged risk of bias (RoB) assessment used in this study is presented in Figure 3A, and the individual RoB scores for each study are presented in Figure 3B. Randomization is considered a fundamental measure to reduce bias, but is rarely reported in preclinical trials. Eighty percent of the included studies reported random allocation of the animals, although no study sufficiently specified the method of randomization. Baseline characteristics and random housing were often considered indicative of low RoB. However, blinding of the investigators and caregivers, random outcome assessment, and blinding of outcome assessment items were frequently rated as unclear RoB. The rating ‘unclear’ was defined as insufficient reporting of most of the relevant criteria that are considered essential for the assessment of preclinical trials. Selective outcome reporting and incomplete outcome data were considered indicative of low RoB (90–100%). Allocation concealment was considered indicative of high RoB. Three studies were presumed to have high RoB because of random sequence generation/selective outcome reporting [41, 43, 46]. During extraction of raw data from included studies, we most often used GetData Graph Digitizer, thereby other bias parameter was rated as unclear RoB. Inadequate reporting of the measures used to reduce bias was reflected in our RoB assessment because numerous items were scored as unclear.

### Meta-analysis

#### *Effects of MT on LPO and carbonylated protein*

The effects of MT on LPO were determined in five studies [40, 41, 43, 48, 49]. Of these, two studies [41, 48] investigated the effects of prolonged MT administration on changes in the abundance of LPO, separately, in male and female groups. Using a random-effects model, we found that prolonged oral MT administration significantly reduced LPO levels ( $I^2 = 79\%$ ;  $SMD = -2.00$ ; 95% CI  $[-2.91, -1.10]$ ;  $p < 0.0001$ ) (Figure 4A). Furthermore, four studies [40, 43, 44, 49] investigated the effects of prolonged MT administration on changes in the abundance of carbonylated protein levels. Using a random-effects model, we found that prolonged oral MT administration significantly reduced carbonylated

protein levels ( $I^2 = 93\%$ ; MD =  $-5.74$ ; 95% CI  $[-11.03, -0.44]$ ;  $p = 0.03$ ) (Figure 4B).

### Effects of MT on changes in antioxidant enzyme activity

The effects of MT on major antioxidant enzymes including catalase (CAT), GPx, and SOD were assessed in two studies each. Additionally, the glutathione reductase (GRx) and reduced glutathione/oxidized glutathione (GSH/GSSG) ratio were evaluated in three and two studies, respectively. Two studies [43, 47] investigated the effects of prolonged MT administration on changes in CAT activity. Using a fixed-effects model, we found that prolonged oral MT administration did not change CAT activity ( $I^2 = 0\%$ ; MD =  $-0.92$ ; 95% CI  $[-2.75, 0.91]$ ;  $p = 0.32$ ) (Figure 5A). Two studies [40, 48] investigated the effects of prolonged

MT administration on changes in GPx activity. Of these, one study [48] investigated the effects of prolonged MT administration on changes in the abundance of GPx, separately, in male and female groups. Using a random-effects model, we found that prolonged oral MT administration significantly enhanced GPx activity ( $I^2 = 65\%$ ; SMD = 3.33; 95% CI  $[1.89, 4.78]$ ;  $p < 0.00001$ ) (Figure 5B). Two studies [40, 47] investigated the effects of prolonged MT administration on changes in SOD activity. Using a fixed-effects model, we found that prolonged oral MT administration did not significantly change SOD activity ( $I^2 = 0\%$ ; SMD =  $-0.60$ ; 95% CI  $[-1.24, 0.05]$ ;  $p < 0.07$ ) (Figure 5C).

Three studies [41, 47, 48] investigated the effects of prolonged MT administration on changes in GRx

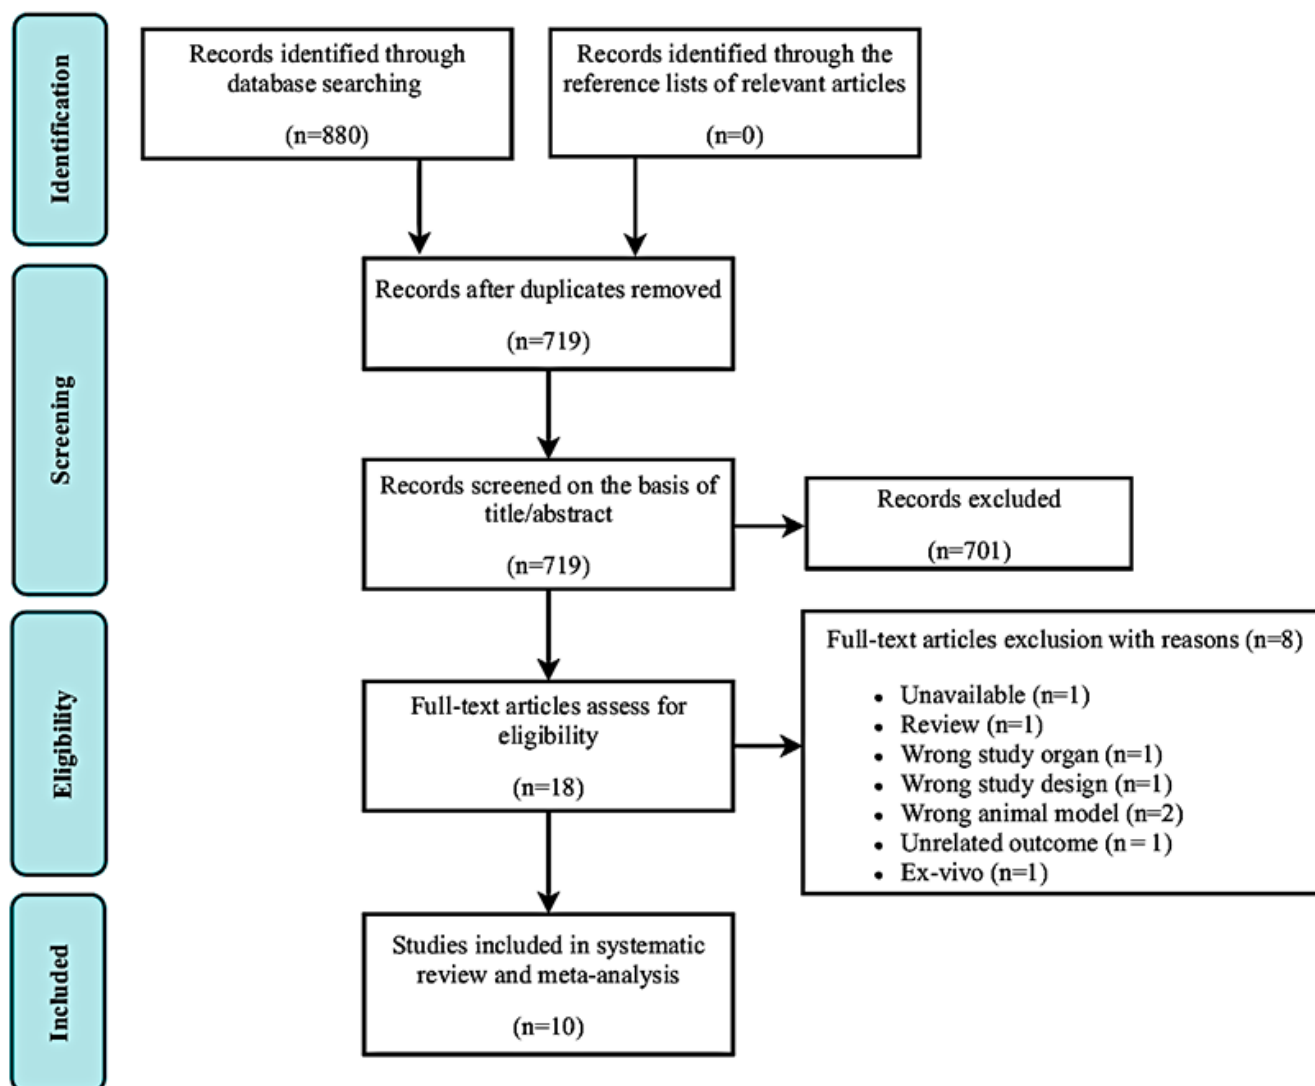

Figure 2. Flow diagram of study search and retrieval process.

**Table 1. Characteristics of the included studies.**

| Author (Year)                          | Age                | Sex  | Con group (n)       | MT group (n)                                                    | ROA                   | Dose (MT)   | Duration                                                                              | Evaluated parameters                                                                                                                                                                                                                                    |
|----------------------------------------|--------------------|------|---------------------|-----------------------------------------------------------------|-----------------------|-------------|---------------------------------------------------------------------------------------|---------------------------------------------------------------------------------------------------------------------------------------------------------------------------------------------------------------------------------------------------------|
| Caballero B et al. [47] (2009)         | Offspring of SAMP8 | NR   | 4                   | 4                                                               | Oral (drinking water) | 10 mg/kg    | From 2 months to 10 months of age                                                     | Brain oxidative stress markers: (SOD, GRx, CAT in cerebral tissue); lysosomal proteases activities: (cathepsin B, cathepsin D); molecular factors: (Bcl-2, p53 by western blot)                                                                         |
| Caballero B et al. [44] (2008)         | One month of SAMP8 | NR   | 4                   | 4                                                               | Oral (drinking water) | 10 mg/kg    | From 2 to 10 months of age                                                            | Brain oxidative stress markers: (carbonylated Protein in the brain); molecular factors: (NF-kB in the whole brain by western blotting; immunohistochemistry for NF-kB)                                                                                  |
| Carretero M et al. [48] (2009)         | Offspring of SAMP8 | Both | Male=9<br>Female=9  | Male=9<br>Female=8                                              | Oral (drinking water) | 10 mg/kg    | From 2 months to 10 months of age                                                     | Brain oxidative stress markers: (LPO, nitrite, GPx, GRx, GSH/GSSG ratio)                                                                                                                                                                                |
| Cheng S et al. [45] (2008)             | Offspring of SAMP8 | Male | 10                  | A. MT-4 <sup>†</sup> group=10<br>B. MT-7 <sup>††</sup> group=10 | Subcutaneous          | 1 mg/kg/day | A. MT-4 group: from 4 to 8 months of age<br>B. MT-7 group: from 7 to 11 months of age | Morphological factors: cresyl violet staining in the hippocampal CA1 and CA3 regions                                                                                                                                                                    |
| García JJ et al. [49] (2011)           | Offspring of SAMP8 | Both | 14                  | 16                                                              | Oral (drinking water) | 10 mg/kg    | From 2 months to 10 months of age                                                     | Brain oxidative stress markers: (LPO, carbonylated Protein, GSH/GSSG ratio); lysosomal proteases activities: (cathepsin B, cathepsin D)                                                                                                                 |
| *Gutierrez-Cuesta J et al. [46] (2008) | Offspring of SAMP8 | Male | 16                  | 16                                                              | Oral (drinking water) | 10 mg/kg    | From 2 months to 10 months of age                                                     | Molecular factors: (SIRT1 acetylated p53, acetylated NFκB in the brain by western blot)                                                                                                                                                                 |
| Gutierrez-Cuesta J et al. [43] (2007)  | One month of SAMP8 | Male | 16                  | 16                                                              | Oral (drinking water) | 10 mg/kg    | From 2 to 10 months of age                                                            | Brain oxidative stress markers: (LPO, carbonylated Protein, CAT in the cerebral cortex); morphological factors: Nissl stain; molecular factors: (immunohistochemistry for cdk5; cdk5, p35, GSK3, tau phosphorylation in the cortex by western blotting) |
| Nogués MR et al. [41] (2006)           | One month of SAMP8 | Both | Male= 8<br>Female=8 | Male= 8<br>Female=8                                             | Oral (drinking water) | 10 mg/kg    | From 2 to 10 months of age                                                            | Plasma oxidative stress markers: (LPO, GRx)                                                                                                                                                                                                             |
| Okatani Y et al. [40] (2002)           | Offspring of SAMP8 | Both | 16                  | 15                                                              | Oral (drinking water) | 10 mg/kg    | From 7 to 12 months of age                                                            | Brain oxidative stress markers: (LPO, carbonylated Protein, SOD, GPx in cerebral tissue)                                                                                                                                                                |
| Rodríguez MI et al. [42] (2007)        | Offspring of SAMP8 | Both | Male=6<br>Female=6  | Male=6<br>Female=6                                              | Oral (drinking water) | 10 mg/kg    | From 2 to 10 months of age                                                            | Plasma inflammatory markers: (IL-1β, IL-2, IL-4, IL-5, IL-10, IFN-γ and TNF-α)                                                                                                                                                                          |

<sup>†</sup>melatonin treatment started from 4 months of age.

<sup>††</sup>melatonin treatment started from 7 months of age.



\*the sample size was obtained from the corresponding author.

Con, control group; MT, melatonin group; n, sample size; ROA, route of administration; SAMP8, senescence-accelerated mouse prone 8; NR, not reported; SOD, superoxide dismutase; GRx, glutathione reductase; CAT, catalase; Bcl-2, B-cell lymphoma 2; NF-κB, Nuclear factor-κB; LPO, lipid peroxidation; GPx, glutathione peroxidase; GSH/GSSG, reduced glutathione/oxidized-glutathione ratio; SIRT1, sirtuin 1; cdk5, cyclin Dependent Kinase 5; GSK3, glycogen synthase kinase 3; IL-1β, interleukin-1β; IL-2, interleukin-2; IL-4, interleukin-4; IL-5, interleukin-5; IL-10, interleukin-10; IFN-γ, interferon-gamma; TNF-α, tumor necrosis factor-α.

activity. Of these, two studies [41, 48] investigated the effects of prolonged MT administration on changes in the abundance of GRx, separately, in male and female groups. Using a random-effects model, we found that prolonged oral MT administration significantly enhanced GRx activity ( $I^2 = 90\%$ ; SMD = 2.59; 95% CI [0.50, 4.68];  $p = 0.01$ ) (Figure 6A). Two studies [48, 49] investigated the effects of prolonged MT administration on changes in the GSH/GSSG ratio. Of these, one study [48] investigated the effects of prolonged MT administration on changes in the GSH/GSSG ratio, separately, in male and female groups. Using a random-effects model, we found that prolonged oral MT administration significantly enhanced the

GSH/GSSG ratio ( $I^2 = 53\%$ ; MD = 1.12; 95% CI [0.77, 1.47];  $p < 0.00001$ ) (Figure 6B).

### Effects of MT on cathepsin B and cathepsin D

The effects of MT on cathepsin B and cathepsin D were determined based on two studies each. With respect to cathepsin B, two studies [47, 49] investigated the effects of prolonged MT administration on changes in cathepsin B levels. Using a fixed-effects model, we found that prolonged oral MT administration significantly reduced the cathepsin B concentration ( $I^2 = 0\%$ ; MD = -2.11; 95% CI [-2.58, -1.63];  $p < 0.00001$ ) (Figure 7A). Regarding cathepsin D, two studies [47, 49] investigated the effects of prolonged MT administration on changes in cathepsin D levels. Using

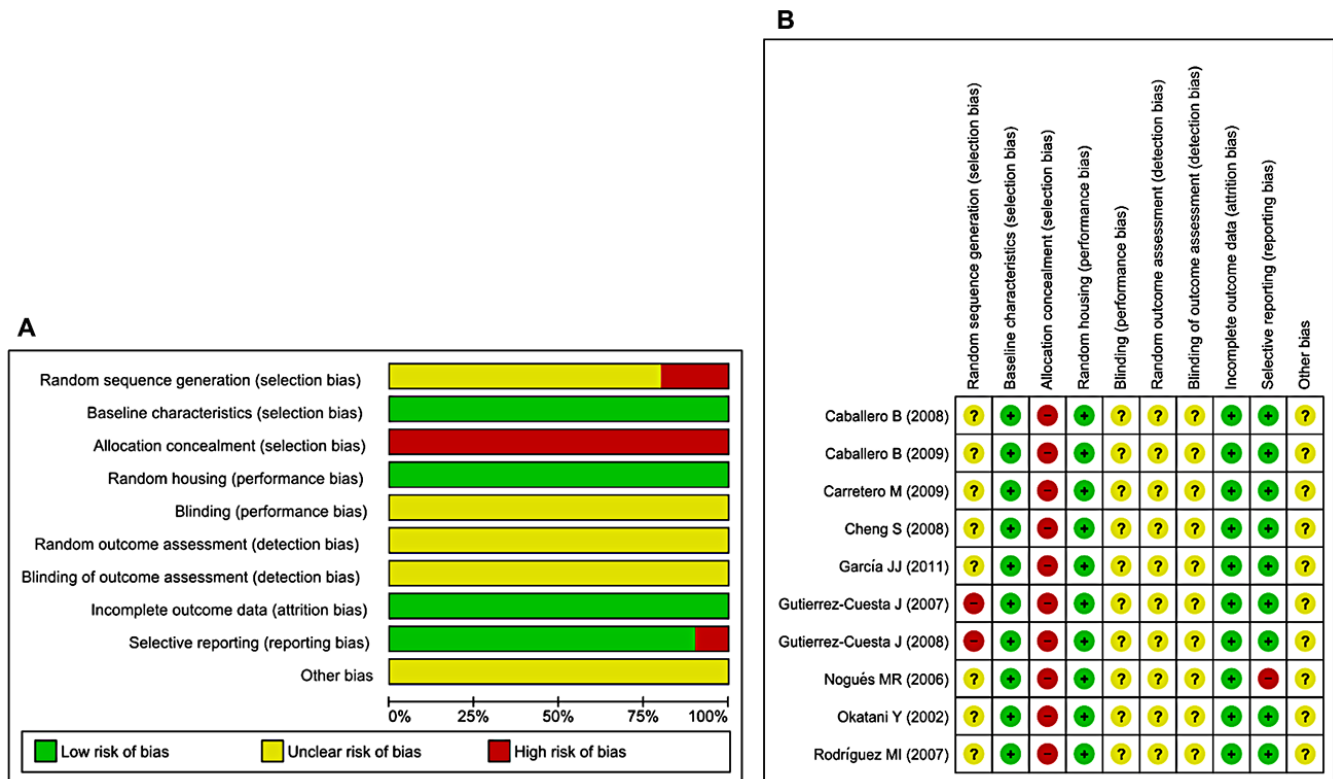

**Figure 3. Risk of bias.** (A) Overall RoB for each item in the SYRCL tool for all included studies. Each RoB item is presented as a percentage based on all included studies. (B) Individual RoB for each of the included animal studies. Each item in the SYRCL tool was scored as ‘yes’, ‘no’, or ‘unclear’.

a fixed-effects model, we found that prolonged oral MT administration significantly reduced the cathepsin D concentration ( $I^2 = 0\%$ ; MD =  $-5.10$ ; 95% CI  $[-7.47, -2.73]$ ;  $p < 0.0001$ ) (Figure 7B).

### Subgroup analysis

Subgroup analysis was performed to investigate heterogeneity among the studies. With regard to LPO, we found considerable heterogeneity ( $I^2 = 79\%$ ). Thus, we performed post hoc subgroup analysis based on sex. Two studies [40, 49] used both male and female animals, but reported combined results. In contrast, three studies [41, 43, 48] reported results separately in male animals and two studies [41, 48] reported results separately in female animals. The test for subgroup differences indicated no statistically significant subgroup effect ( $p = 0.62$ ), suggesting that sex did not modify the effect of MT compared with control intervention. Notably, the pooled effect estimates for male animals did not favor MT intervention ( $p = 0.10$ ), although the pooled effect estimates for female animals and combined sex subgroups favored MT intervention ( $p = 0.002$ ;  $p < 0.00001$ , respectively). However, there was substantial unexplained heterogeneity between trials

involving male and female subgroups (males:  $I^2 = 89\%$ ; females:  $I^2 = 56\%$ ) (Figure 8). Furthermore, there was moderate heterogeneity in the combined sex subgroups ( $I^2 = 33\%$ ), reduced heterogeneity in female animals (overall  $I^2 = 79\%$  to  $I^2 = 56\%$ ), and enhanced heterogeneity in male animals (overall  $I^2 = 79\%$  to  $I^2 = 89\%$ ). Therefore, the validity of the treatment effect estimate for male and female subgroups is uncertain because individual trial results were inconsistent.

Analysis of GRx revealed considerable heterogeneity ( $I^2 = 90\%$ ), so we performed post hoc subgroup analysis based on sex. Two studies reported male animals separately and two studies reported female animals separately [41, 48]. The test for subgroup differences indicated no statistically significant subgroup effect ( $p = 0.69$ ), implying that sex could not significantly modified the effect of MT compared with control intervention. However, a smaller number of trials and animals contributed data to both male and female subgroups, meaning that the analysis may not be able to detect subgroup differences. It is interesting to note that the pooled effect estimate for both subgroups favors MT intervention over the control intervention (Figure 9).

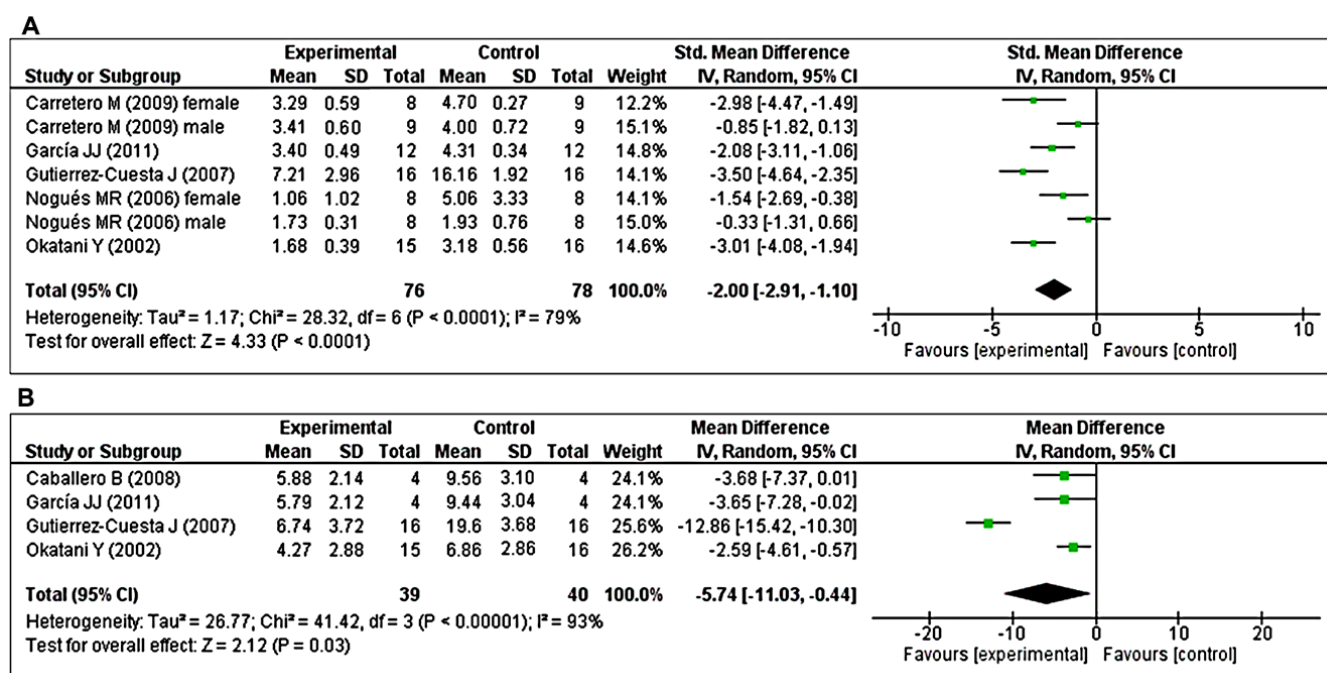

**Figure 4. Forest plot comparing changes in the abundance of LPO and carbonylated protein levels between MT-treated and vehicle-treated groups.** Compared with vehicle treatment, (A) LPO and (B) carbonylated protein levels were both significantly reduced in the MT-treated group. The unit for LPO almost in all studies is nmol/mg, except Nogués MR et al. (nmol/ml). For carbonylated protein the unit is nmol/mg. The prism represents the overall statistical results of the experimental data, squares represent the weight of each study, and horizontal lines represent the 95% CIs for each study. MT, melatonin; LPO, lipid peroxidation; CI, confidence interval; SD, standard deviation; IV, independent variable.

## Sensitivity analysis

Sensitivity analysis by excluding individual studies revealed that the LPO (Supplementary Table 1), and GRx (Supplementary Table 4) results were not modified when compared to the overall effect and their heterogeneity, indicating that our results were not driven by any single study and that similar results could be obtained after excluding any of the included studies. The sensitivity analysis based on carbonylated protein indicated that heterogeneity decreased ( $I^2 = 0\%$ ,  $p = 0.81$ ) when reference [43] was excluded; the adjusted MD was -3.00; 95% CI [-4.59, -1.40] (Supplementary Table 2). In accordance with GPx, the sensitivity analysis indicated that heterogeneity decreased ( $I^2 = 5\%$ ,  $p = 0.30$ ) when reference [48] was excluded; the adjusted SMD was 2.61 95% CI [1.77, 3.46] (Supplementary Table 3). According to GSH/GSSH ratio, the sensitivity analysis indicated that heterogeneity decreased ( $I^2 = 27\%$ ,  $p = 0.24$ ) when reference [48] was excluded; the adjusted MD was 1.25; 95% CI [0.93, 1.58] (Supplementary Table 5). Overall,

sensitivity analysis demonstrated that the results produced in this meta-analysis were robust.

## Publication bias

Except for GRx activity ( $p = 0.0000$ , Egger's test) there was no evidence of publication bias for studies examining the effects of LPO ( $p = 0.0767$ , Egger's test; funnel plot: Supplementary Figure 1), and carbonylated protein ( $p = 0.7538$ , Egger's test). Using the trim-and-fill method, one potentially missing study was imputed for the analysis of GRx (Supplementary Figure 2). The imputed effect size of GRx was SMD 1.81; 95% CI [-1.12, 4.74].

## Systematic review of senescence-associated factors

### Effects of MT on senescence-associated molecular factors

NF- $\kappa$ B pathways are currently considered the primary causes of OS-induced CS [18]. Furthermore, OS

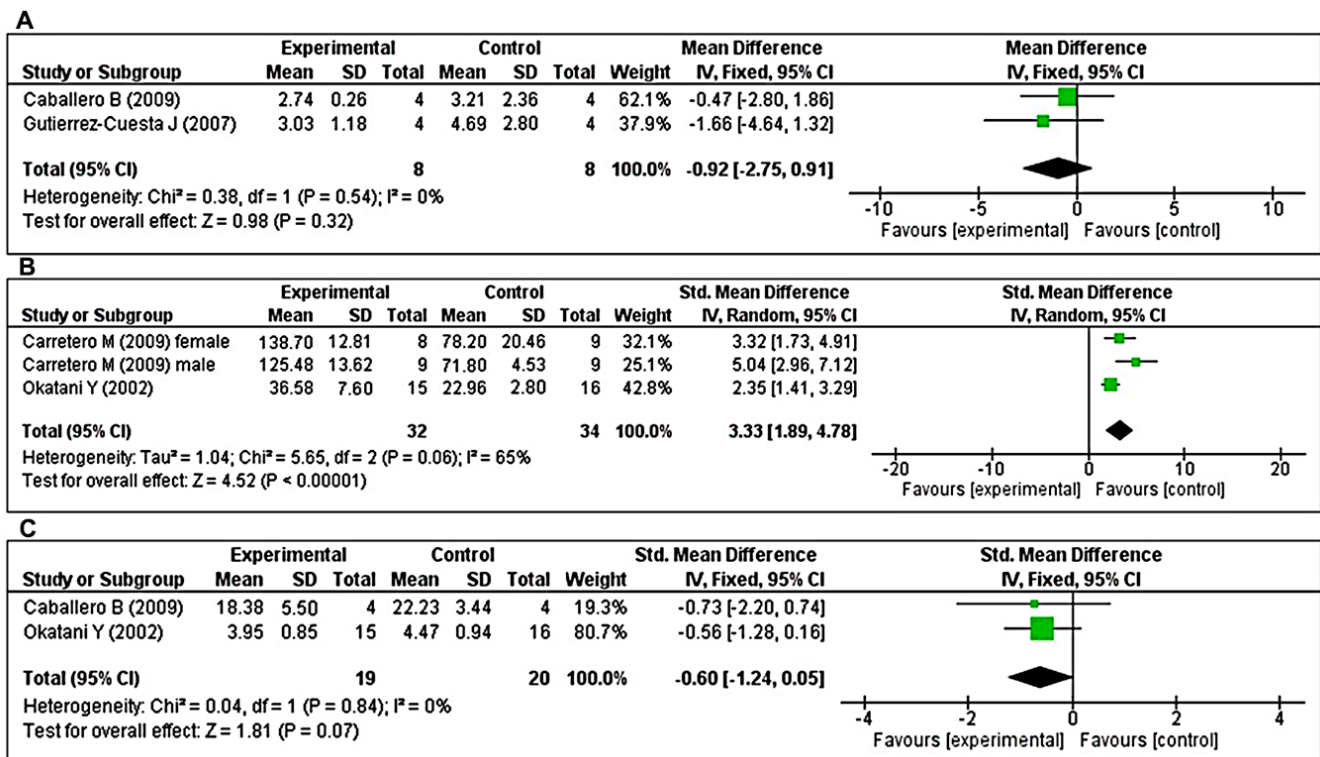

**Figure 5. Forest plot comparing changes in antioxidant enzyme activity between MT-treated and vehicle-treated groups.** Compared with vehicle treatment, (A) CAT activity was unchanged in the MT-treated group, (B) GPx activity was significantly enhanced in the MT-treated group, and (C) SOD activity did not differ in the MT-treated group. The unit for catalase and SOD are  $\mu\text{mol}/\text{mg}$ , and  $\text{U}/\text{mg}$ , respectively. For GPx, the unit is  $\text{nmol}/\text{min}/\text{mg}$  in Carretero M et al. and  $\text{mU}/\text{min}/\text{mg}$  in Okatani Y et al. The prism represents the overall statistical results of the experimental data, squares represent the weight of each study, and horizontal lines represent the 95% CIs for each study. MT, melatonin; CAT, catalase; GPx, glutathione peroxidase; SOD, superoxide dismutase; CI, confidence interval; SD, standard deviation; IV, independent variable.



induces nuclear translocation of NF- $\kappa$ B leading to its activation and the simultaneous generation of inflammatory factors such as tumor necrosis factor- $\alpha$  (TNF- $\alpha$ ), interleukins, and chemokines [50–52]. Importantly, higher levels of NF- $\kappa$ B p50 subunits have been found in the nucleus in SAMP-8 mice at 10 months of age, indicating activation of this transcriptional factor in association with age-related enhanced OS [44]. In contrast, MT treatment reduced NF- $\kappa$ B p50 subunit levels in SAMP-8 mice and led to a clear reduction in nuclear localization [44]. Another study reported that pro-inflammatory mediators such as interleukin-1 $\beta$ , TNF- $\alpha$ , and interleukin-6 expression were elevated in SAMP-8 at 10 months of age, particularly in the hippocampal region [53]. Consistent with these findings, Rodríguez et al. also reported that pro-inflammatory cytokines, mainly interferon gamma and TNF- $\alpha$ , were elevated in plasma from SAMP8 mice at 10 months of age. These elevated levels were counteracted by prolonged MT treatment [42]. Similarly, Gutierrez-Cuesta et al. demonstrated that prolonged MT treatment reduced NF- $\kappa$ B in the 10-month-old SAMP8 mouse brain, although to a lesser extent [46]. Thus, reduced longevity could be due to sustained activation of NF- $\kappa$ B, which leads to age-related diseases [54].

Cdk5 may be an important link between OS and CS [19]. In SAMP8 mice, the activation of Cdk5 was

significantly increased at 10 months of age [43], the age of senescence onset [55]. Importantly, oral MT administration (10 mg/kg, from 2 to 10 months of age) reduced this activation [43], suggesting that a reduction in CS leads to diminished age-related neurodegeneration. In the same study, MT lowered the levels of Cdk5/p35 and active glycogen synthase kinase 3 $\beta$  (GSK3 $\beta$ ), and enhanced the levels of inactive GSK3 $\beta$  (Ser9), in 10-month-old SAMP8, thus causing reduced tau hyperphosphorylation [43]. These findings indicate that Cdk5 and GSK3 $\beta$  might be interrelated and may contribute to senescence.

p53 is a pro-apoptotic transcriptional factor that is induced by OS and is considered important in the induction of CS [20]. Surprisingly, the deacetylation of p53 through sirtuin-1 (SIRT1) may suppress CS and apoptosis induced by OS [56]. In previous time-course studies, SIRT1 expression showed progressive reduction from 3 to 12 months of age in SAMP8 mice [57]. Likewise, compared with untreated animals, oral administration of MT treatment (10 mg/kg) in drinking water induced significant enhancement of SIRT1 expression and reduced the expression of acetylated p53 in SAMP8 mice [46]. Western blot analysis also showed that a gradual age-dependent enhancement of p53 levels was reduced by chronic MT treatment in the SAMP8 mouse brain [47]. In addition, p53-mediated

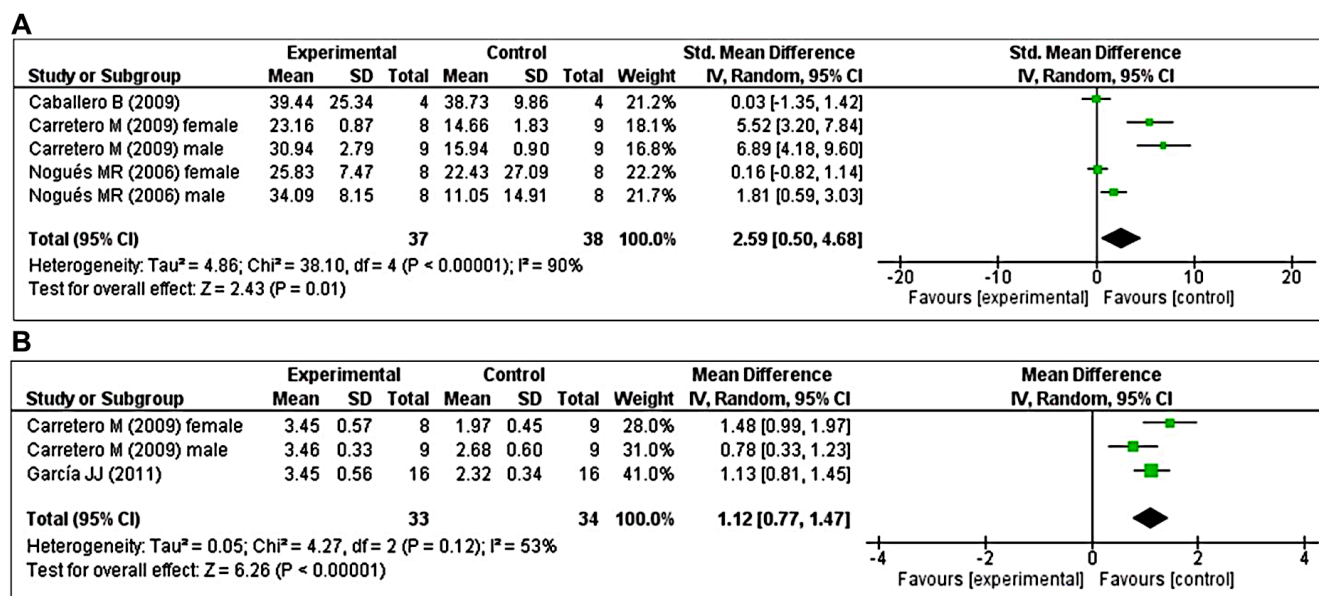

**Figure 6. Forest plot comparing changes in GRx activity and GSH/GSSG ratio between MT-treated and vehicle-treated groups.** Compared with vehicle treatment, (A) GRx activity and (B) GSH/GSSG ratio were both significantly enhanced in the MT-treated group. The unit for GRx almost in all studies is nmol/mg, except Nogués MR et al. (nmol/ml). The prism represents the overall statistical results of the experimental data, squares represent the weight of each study, and horizontal lines represent the 95% CIs for each study. MT, melatonin; GRx, glutathione reductase; GSH/GSSG, reduced-glutathione/oxidized-glutathione; CI, confidence interval; SD, standard deviation; IV, independent variable.

suppression of apoptosis inhibitory proteins, such as Bcl-2, was augmented by long-term MT treatment in SAMP8 mice [47].

### Effects of MT on senescence-associated morphological factors

Data from several studies suggest that senescence accelerates gliosis during aging, which might contribute to neuronal dysfunction [58]. Nissl staining analysis showed that gliosis in cortical layers was reduced following 9 months of dietary intake of MT, compared with vehicle-treated SAMP8, suggesting a neuroprotective effect of MT during aging [43]. Moreover, cresyl violet staining in the hippocampal CA1 and CA3 regions of SAMP8 showed that subcutaneous MT treatment (1 mg/kg/day) increased the density of pyramidal neurons, when compared with untreated mice ( $P < 0.01$ ) [45]. No differences were observed between the early-age MT treatment group (SAMP8 age = 4–8 months) and the late-age MT treatment group (SAMP8 age = 8–11 months). Furthermore, in hippocampal CA3 regions, the early-age MT treatment group showed markedly greater numbers of pyramidal neurons, compared with the late-age MT treatment group ( $P < 0.05$ ). No differences were observed between the late-age MT treatment and control groups [45].

## DISCUSSION

This study systematically reviewed previous research concerning the protective effect of MT against brain

aging in the SAMP8 mouse model, which shares similar pathophysiological features with humans in terms of brain aging [22]. The principal aim was to provide evidence for the therapeutic potential of MT to promote healthy aging and prevent age-related diseases by maintenance of physiological homeostasis between OS and CS. In recent years, several feasible interventions (e.g., MT) to delay aging have been studied in SAMP8 mice, although these have led to some conflicting results [40, 45, 47]. Furthermore, no single systematic review and meta-analysis has been conducted to evaluate the efficacy of MT in this context. To our knowledge, this is the first systematic review and meta-analysis concerning the effects of MT on OS-induced brain aging in SAMP8 mice. Our results suggest that prolonged MT treatment increases oxidative stability and antioxidative enzyme activity, reduces lysosomal enzymatic function, and regulates senescence-associated factors in the brain. Among the indicators and oxidant/antioxidant factors considered during investigation of this topic, LPO, carbonylated protein, CAT, GPx, SOD, GRx, GSH/GSSG ratio, cathepsin B, and cathepsin D have been evaluated in meta-analyses of animal trials. Additionally, senescence-associated molecular and morphological factors (e.g., NF- $\kappa$ B, Cdk5, and p53) were systematically reviewed in the SAMP8 mouse model.

Despite extensive efforts, we were only able to include 10 studies in this review. Of these, five aimed to evaluate the effects of prolonged MT treatment on

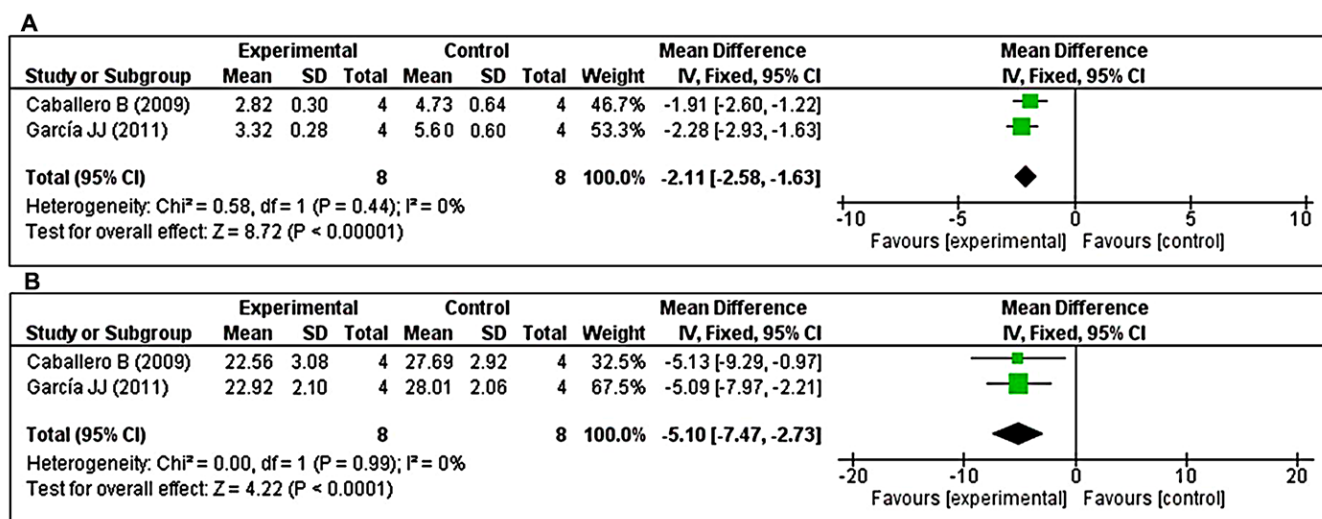

**Figure 7. Forest plot comparing changes in the levels of cathepsins B and D between MT-treated and vehicle-treated groups.** Compared with vehicle treatment, (A) cathepsin B and (B) cathepsin D levels were both significantly reduced in the MT-treated group. The unit for cathepsin B and cathepsin D are mU/mg, and U/mg, respectively. The prism represents the overall statistical results of the experimental data, squares represent the weight of each study, and horizontal lines represent the 95% CIs for each study. MT, melatonin; CI, confidence interval; SD, standard deviation; IV, independent variable.

changes in LPO levels. The meta-analysis results showed that MT treatment led to a significant reduction in the amount of LPO ( $p < 0.0001$ ), indicating that MT was effective against oxidative degradation of lipids during aging. These results are consistent with the findings of Verma et al. (2020), who found that MT supplementation could alleviate age-related enhancement of LPO through the maintenance of normal redox homeostasis [59]. Taken together, these data indicate that the age-dependent decline in pineal MT synthesis may contribute to increased production of LPO end products, and that MT supplementation can reverse these detrimental effects. Mitochondrial LPO exhibited a sharp enhancement at 10 months of age in SAMP8 mice [49]. Thus, we assessed the effects of MT at  $\geq 10$  months of age. However, these data must be interpreted cautiously because there was substantial unexplained heterogeneity between trials within male and female subgroups (male:  $I^2 = 89\%$ ; female:  $I^2 = 56\%$ ). Therefore, the validity of the treatment effect estimate for male and female animals is uncertain because individual trial results were inconsistent.

A prior study by Carney and colleagues [60] revealed age-related increases in carbonyl concentrations in an animal model of brain aging. The formation of carbonyl protein by free radicals (widely regarded as an indicator of oxidative damage) is primarily involved in cell damage during normal aging and aging-related diseases [15, 60]. In the brain, oxidized protein exhibits complex connections with the levels of antioxidative enzymes, proteolytic elimination of oxidized proteins, and generation of pro-oxidant substances [61]. Consistent with published literature, our meta-analysis revealed that prolonged MT treatment significantly reduced the formation of carbonylated proteins, compared with untreated SAMP8 mice ( $p = 0.03$ ), suggesting that age-related enhancement of oxidative brain damage could be prevented by reducing carbonylated protein levels. Notably, the positive results might have been due to a high degree of heterogeneity ( $I^2 = 93\%$ ) among the included studies. Hence, the validity of the treatment effect estimate for this outcome is dubious because individual study results were inconsistent.

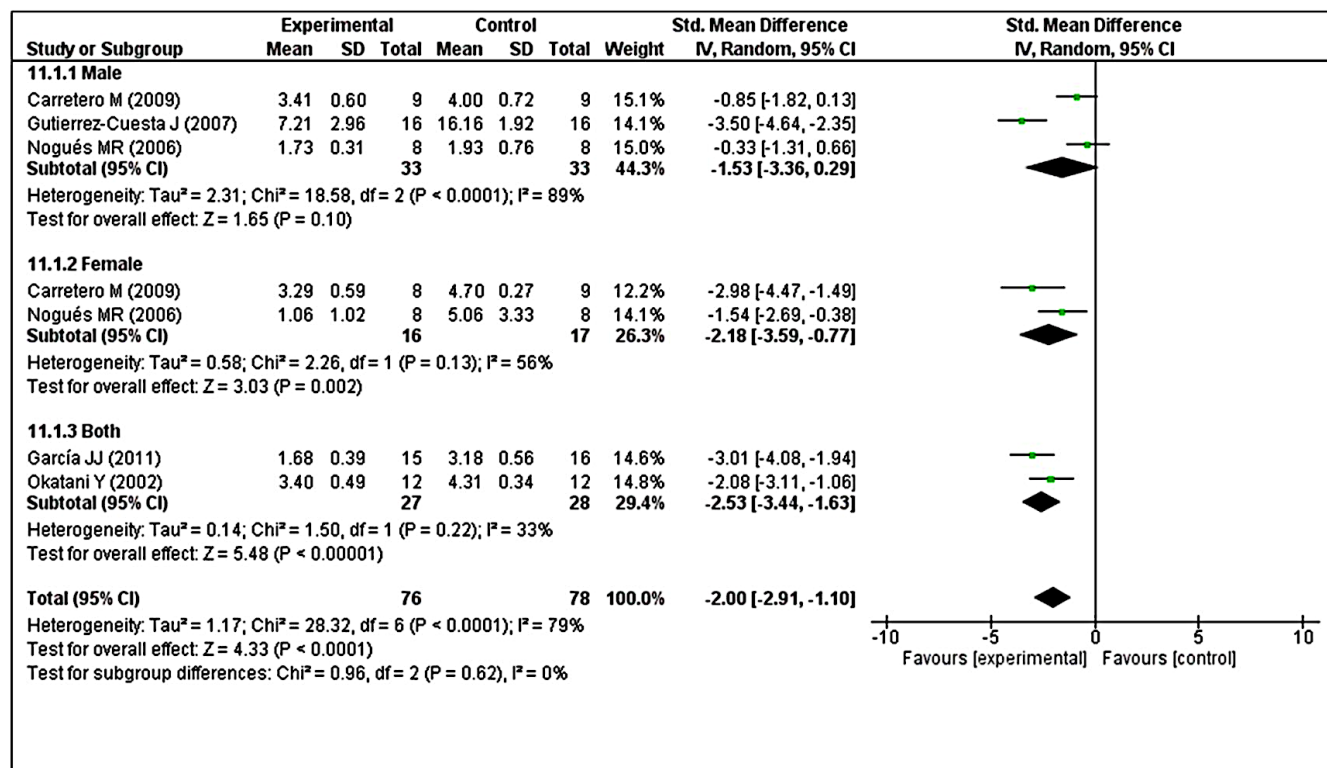

**Figure 8. Subgroup analysis of LPO levels stratified according to sex.** The test for subgroup differences showed no statistically significant subgroup effect ( $p = 0.62$ ), indicating that sex did not modify the effect of MT intervention, compared with vehicle-treated groups. However, considerable heterogeneity was observed in the male ( $I^2 = 89\%$ ) and female ( $I^2 = 56\%$ ) subgroups. The unit for LPO almost in all studies is nmol/mg, except Nogués MR et al. (nmol/mL). The prism represents the overall statistical results of the experimental data, squares represent the weight of each study, and horizontal lines represent the 95% CIs for each study. LPO, lipid peroxidation; MT, melatonin; I, heterogeneity; CI, confidence interval; SD, standard deviation; IV, independent variable.

Accumulation of high protein content was observed in the aged SAMP8 mouse brain [44], presumably due to neurodegeneration and age-related OS [43]. These aggregations may result from disturbances in typical enzymatic activity caused by OS during brain aging. Changes in the activities of antioxidant enzymes, including CAT, led to elevated levels of OS in SAMP8 mice until 10 months of age; this may be one cause of senescence-related impairments and degeneration in the brain [43]. Surprisingly, no differences were found in CAT activity between the MT and vehicle treatment groups ( $p = 0.32$ ). This outcome is contrary to that of Tütüncüler et al., who found that the administration of exogenous MT effectively protected against brain injury by increasing CAT activity [62]. Conversely, Gutierrez-Cuesta et al. reported that long-term MT treatment significantly reduced CAT expression in SAMP8 mice, compared with untreated SAMP8 mice [43]. One possible explanation is that long-term MT treatment differentially interacted with CAT activity. Specifically, prolonged presence of MT led to low OS, suggesting a linear relationship between OS and CAT activity [43]. Additionally, we demonstrated that MT supplementation significantly enhanced GPx activity ( $p < 0.00001$ ) in SAMP8 mice. This result implies that MT administration promoted antioxidant enzyme activity in the brain and may thereby provide indirect protection against free radical injury [63]. Surprisingly, MT treatment did not affect SOD activity in the SAMP8 brain ( $p = 0.07$ ), although randomized controlled trials of MT showed marked increases in SOD expression

[64]. This result contributes to the ongoing controversy regarding the link between SOD activity and aging [65], whereby SOD activity was not influenced by MT administration [62]. In contrast, GRx activity in SAMP8 mice was significantly reduced during aging, and MT treatment significantly enhanced GRx activity compared with the untreated group in the same mouse model ( $p = 0.01$ ). These findings indicated that the decline in GRx activity may play a significant role in brain damage. Notably, the results may be biased due to insufficient trials (two studies per subgroup) and numbers of animals in each subgroup (male = 34; female = 33), so the covariate distribution is problematic for this subgroup analysis. Furthermore, the GSH/GSSG ratio significantly decreases with age [66], although our meta-analysis results showed that long-term MT treatment significantly enhanced the GSH/GSSG ratio ( $p < 0.00001$ ) in SAMP8 mice. This result is in agreement with the findings of Alzoubi et al., who demonstrated that MT reduced OS by enhancing the GSH/GSSG ratio in the rat hippocampus [67].

Cathepsins B and D are the main lysosomal proteases and are abundantly expressed in the brain [68, 69]. It is unsurprising that the levels of these proteases increase with age, as well as in several age-dependent neurodegenerative diseases [70, 71]. The results from previous studies revealed that the levels of these proteases were increased in the aged SAMP8 mouse brain [49]. In particular, cathepsin D is regarded as a marker of aging [72]. Our meta-analysis results showed

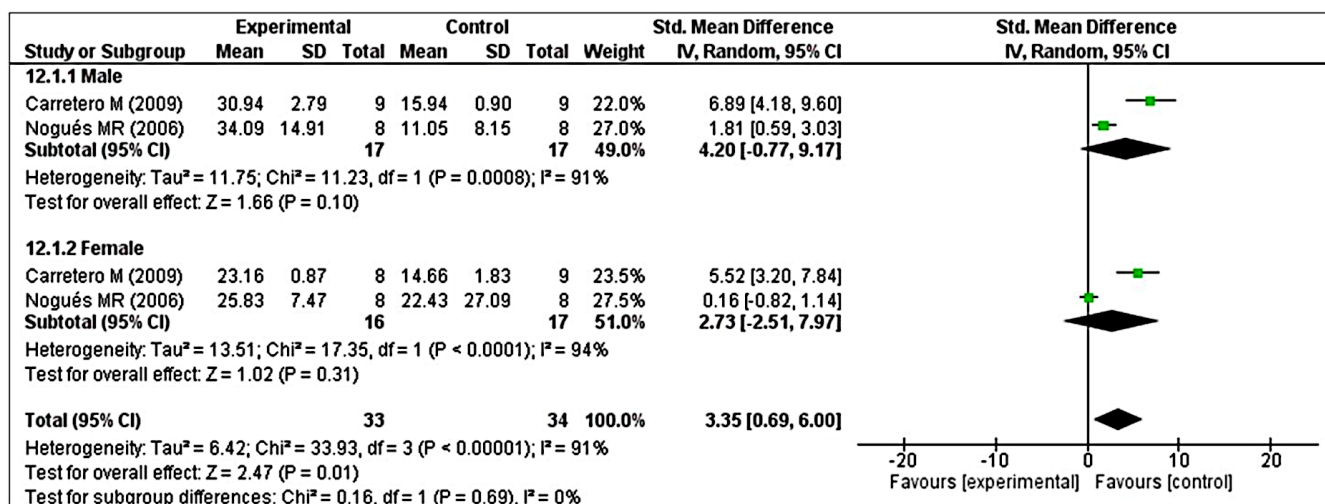

**Figure 9. Subgroup analysis of GRx levels stratified according to sex.** The test for subgroup differences showed a significant subgroup effect ( $p = 0.69$ ), suggesting that sex did not modified the effect of MT intervention, compared with vehicle-treated groups. It is interesting to note that the pooled effect estimate for both subgroups favors MT intervention over the control intervention. The unit for GRx almost in all studies is nmol/mg, except Nogués MR et al. (nmol/mL). The prism represents the overall statistical results of the experimental data, squares represent the weight of each study, and horizontal lines represent the 95% CIs for each study. GRx, glutathione reductase; MT, melatonin; I, heterogeneity; CI, confidence interval; SD, standard deviation; IV, independent variable.



that MT significantly reduced both cathepsin B ( $p < 0.00001$ ) and cathepsin D ( $p < 0.0001$ ) levels in the brains of SAMP8 mice, indicating that lysosomal impairment may be involved in brain aging. This finding broadly supports the work of other studies in this area that link lysosomal impairment with aging [73, 74].

Most recently, Bernal et al. showed that the activation of NF- $\kappa$ B led to CS acceleration via telomere dysfunction [75]. In addition, an age-related increase in the inflammatory response is considered a hallmark of CS [76]. Moreover, lysosomal enzymes (e.g., cathepsin B) indirectly activate NF- $\kappa$ B, resulting in microglial senescence-induced brain aging [77]. In our systematic review, we found that prolonged MT treatment reduced NF- $\kappa$ B p50 levels in SAMP8 mice, and markedly reduced nuclear localization indicating lower NF- $\kappa$ B activity [44]. On the basis of these data, we infer that potent NF- $\kappa$ B activation and its associated inflammatory response may contribute to aging processes linked to accelerated senescence in SAMP8 mice. In contrast, prolonged MT treatment may suppress CS and age-related disorders by down-regulation of NF- $\kappa$ B signaling. These results are in agreement with the findings of Fang et al., who showed that MT prevented senescence through inhibition of NF- $\kappa$ B signaling pathways [78].

Previously, Lee et al. demonstrated that Cdk5 stabilizes and activates p53, a common pathway that promotes CS [79], thereby supporting the notion that Cdk5 is involved in senescence induction [19, 80]. The activation of Cdk5 and the levels of active GSK3 $\beta$  (Tyr216) were significantly increased at 10 months of age in SAMP8 mice, although MT mitigated these changes [43], thus implying that Cdk5 and GSK3 $\beta$  might be related and may contribute to senescence. These results reflect the findings of Liu et al., who reported the inhibition of Cdk5 and GSK-3 $\beta$  activities, as well as reduction of Alzheimer's disease-like pathology, in senescence-accelerated mice [81].

OS plays a critical role in the activation of the p53 transcriptional responses, which is responsible for the regulation of both CS and aging [20]. Surprisingly, the deacetylation of p53 through SIRT1 may suppress both OS-induced CS and OS-induced apoptosis [56]. The expression of Bcl-2 is enhanced in human fibroblasts naturally during senescence and upon induction of OS-induced senescence-like growth arrest, implying its role in maintenance of their extended viability [82, 83]. These findings suggested that elevated OS during the aging process dysregulates apoptosis, thereby inducing CS. They also corroborate previous results, in that senescent

cells do not readily undergo apoptosis [84]. Our data suggest that oral MT treatment (10 mg/kg) induced significant elevation of SIRT1 expression and reduced the expression of acetylated p53 in SAMP8 mice [46]. In accordance with the present results, earlier findings demonstrated that SIRT1 overexpression led to reduction of p53 gene expression [85, 86]. Additionally, Liu et al. demonstrated that SIRT1 reversed senescence via attenuation of OS-induced apoptosis and promotion of p53 degradation [86].

## CONCLUSIONS AND FUTURE DIRECTIONS

This study was performed to evaluate the ability of MT to foster healthy aging and counteract age-related disorders by inhibition of pathways involved in accelerated senescence. The findings of this study suggest that orally administered long-term MT treatment reduces formation of LPO, carbonylated proteins, and lysosomal proteases. Moreover, it increases the activities of GPx and GRx, as well as the GSH/GSSG ratio. Although the potential source of heterogeneity has been investigated through leave-one-out sensitivity analyses, our findings have some limitations with respect to generalizability. For instance, there was substantial unexplained heterogeneity between trials within male and female subgroups. If the debate is to be moved forward, a better understanding of sex-specific long-term MT effects is needed. Another important result was that the CAT and SOD activities remain unchanged with MT intervention. Further research should explore how short-term and long-term MT interventions differentially impact CAT and SOD activities during aging. The second major finding was that MT administration can regulate senescence-associated molecular and morphological factors. Although we only narratively described these results because of the small number of studies, the findings offer some insight into how MT non-destructively regulates CS. Further studies would be useful regarding validation of the anti-senescence role of MT. Finally, our quality assessment using the SYRCLE RoB tool indicated that all included studies had considerable methodological limitations, a high risk of selection bias, and unclear risk of detection bias. Information regarding key measures essential for bias reduction (e.g., allocation concealment, random outcome assessment, and blinding) was often missing or insufficiently reported. Unfortunately, this is common in animal studies and limits our ability to draw plausible conclusions [87, 88]. We strongly recommend improvements to the reporting system for animal models to reduce the RoB; recently developed guidelines should be followed to enhance the quality of animal studies [89, 90].



## MATERIALS AND METHODS

### Search strategy

Research articles reporting the effects of MT on the brain in SAMP8 were included in this systematic review and meta-analysis. The literature search was executed using keywords such as ‘melatonin’ in combination with ‘brain, aging, CS, and SAMP8’ in the following databases: PubMed, Embase, and CINAHL for studies published until August 2019. The reference lists of the included studies and those of relevant reviews were examined to identify additional relevant studies. The in-depth search strategy performed in the PubMed electronic database is shown in Supplementary Table 6. No limits on language or publication date were used.

### Inclusion and exclusion criteria

A systematic review and meta-analysis of research assessing the effects of exogenous MT on OS in the brain or plasma of SAMP8 mice was performed if the parameter of interest was reported in two or more studies. The systematic review focused on senescence-associated molecular and morphological factors. The meta-analysis focused on the levels/activities of brain/plasma OS markers (e.g., LPO, carbonylated protein, SOD, GPx, GRx, CAT, and GSH/GSSG ratio), as well as the levels/activities of lysosomal enzymes (e.g., cathepsins B and D), which were compared between vehicle control and MT treatment groups. Studies were excluded if they did not use SAMP8 mice, used interventions other than MT, were *ex vivo* or *in vitro* experiments, were unrelated outcome or review format, or were not published in English (Supplementary Table 7).

### Study selection

After removal of duplicates, all unique trials were imported into a Rayyan-a web application [91] to allocate the references randomly. Next, two authors individually screened the titles and abstracts to select relevant studies from the randomly allocated references. Finally, the full texts of the selected articles were evaluated to identify trials that fulfilled our eligibility criteria. Any disagreement concerning study selection was settled by consultation with a third author. Notably, screening for the presence or absence of specific outcome measures was not performed during this phase because some outcome measures were not described in the abstract.

### Data extraction

Two authors individually extracted the data from each of the included studies. Information related to the authors, publication year, age, sex, sample size,

intervention (i.e., dose, route of administration, and duration), and outcome measures were extracted. For studies with multiple interventions, only data from the control and MT treatment groups were considered in this analysis. If published outcome data were incomplete, attempts were made to contact the study authors to obtain the original data. A reminder was sent by email to authors who had not responded within 2 weeks. If efforts to acquire the original data failed, the article was eliminated from the meta-analysis. If the data were only presented graphically, GetData Graph Digitizer (<http://getdata-graph-digitizer.com/>) was used to extract numerical data from graphs or figures.

### Assessment of methodological quality

The RoB in the included articles was evaluated by two independent reviewers using the SYRCLE RoB tool [92], which was developed based on the Cochrane RoB tool [93] to evaluate aspects of bias specifically encountered in animal intervention studies. The tool contains 10 items related to six types of bias (selection, performance, detection, attrition, reporting, and other bias). Responses of ‘yes’, ‘no’, and ‘unsure’ indicated low, high, and unclear RoB, respectively.

### Data analysis

The experimental and control group data from the included studies were extracted and entered into the Review Manager software (RevMan 5.3, The Nordic Cochrane Centre, Copenhagen, Denmark). A meta-analysis was performed when at least two studies were analogous in terms of population, intervention, comparison, outcome process, and study design, and when these studies provided relevant data. For effect size analysis, the MD was used when the outcome measures of all studies employed the same scale, and the SMD was used when the studies assessed the same outcome by means of distinct measurements. For both strategies, 95% CIs were calculated. Large SMD effect size was considered 0.8, moderate 0.5, and small 0.2 [94]. The  $I^2$  test was used to assess heterogeneity among studies. A fixed-effects model was used for the meta-analysis when  $I^2$  was  $\leq 50\%$ , and a random-effects model was used when  $I^2$  was  $> 50\%$ , indicating substantial heterogeneity [95]. Subgroup analyses were performed only when subgroups contained at least two independent comparisons. Whenever three or more studies were included, a leave-one-out sensitivity analysis was performed by iteratively removing 1 study at a time to confirm that our findings were not driven by any single study, as well as, to assess potential sources of heterogeneity [96]. Publication bias was investigated via Egger's test ( $\geq 4$  studies) and visual inspection of funnel plots ( $\geq 5$  studies) using Stata/SE software,

Version 16.0 (Stata Corp., College Station, TX) ( $p < 0.05$ ) [97, 98]. Whenever publication bias was detected either funnel plot asymmetry or Egger's regression test, the trim and fill method was used to calculate the effect size by estimating the number of missing studies [99].

## AUTHOR CONTRIBUTIONS

Conceptualization, Y.H. and D.M.S.; investigation, D.M.S., Z.A.K. and J.C.; writing, D.M.S. and Y.H.; visualization, D.M.S., Z.A.K. and J.C.; editing and supervision, Y.H.; funding acquisition, Y.H. All authors have read and agreed to the published version of the manuscript.

## ACKNOWLEDGMENTS

The authors would like to acknowledge the invaluable support and critical comments of members in 'Biological Clock and Aging Control' laboratory. This study was completed as part of the doctoral dissertation by D.M.S.

## CONFLICTS OF INTEREST

The authors declare that they have no conflicts of interest.

## FUNDING

This work was supported in part by grants from the National Research Foundation (2017R1D1A1B0302956514, 2020R1A2C201215511 to Y.H.), Korea. This work was also supported by the 2016-2018 Creative Research Program of Inje University, Korea.

## REFERENCES

1. Suzman R, Beard JR, Boerma T, Chatterji S. Health in an ageing world--what do we know? *Lancet*. 2015; 385:484–86.  
[https://doi.org/10.1016/S0140-6736\(14\)61597-X](https://doi.org/10.1016/S0140-6736(14)61597-X)  
PMID:25468156
2. Niccoli T, Partridge L. Ageing as a risk factor for disease. *Curr Biol*. 2012; 22:R741–52.  
<https://doi.org/10.1016/j.cub.2012.07.024>  
PMID:22975005
3. van Deursen JM. The role of senescent cells in ageing. *Nature*. 2014; 509:439–46.  
<https://doi.org/10.1038/nature13193> PMID:24848057
4. López-Otín C, Blasco MA, Partridge L, Serrano M, Kroemer G. The hallmarks of aging. *Cell*. 2013; 153:1194–217.  
<https://doi.org/10.1016/j.cell.2013.05.039>  
PMID:23746838
5. Chandrasekaran A, Idelchik MD, Melendez JA. Redox control of senescence and age-related disease. *Redox Biol*. 2017; 11:91–102.  
<https://doi.org/10.1016/j.redox.2016.11.005>  
PMID:27889642
6. Baraibar MA, Liu L, Ahmed EK, Friguet B. Protein oxidative damage at the crossroads of cellular senescence, aging, and age-related diseases. *Oxid Med Cell Longev*. 2012; 2012:919832.  
<https://doi.org/10.1155/2012/919832> PMID:23125894
7. Chen JH, Hales CN, Ozanne SE. DNA damage, cellular senescence and organismal ageing: causal or correlative? *Nucleic Acids Res*. 2007; 35:7417–28.  
<https://doi.org/10.1093/nar/gkm681> PMID:17913751
8. Colavitti R, Finkel T. Reactive oxygen species as mediators of cellular senescence. *IUBMB Life*. 2005; 57:277–81.  
<https://doi.org/10.1080/15216540500091890>  
PMID:16036611
9. Marcheggiani F, Cirilli I, Orlando P, Silvestri S, Vogelsang A, Knott A, Blatt T, Weise JM, Tiano L. Modulation of Coenzyme Q<sub>10</sub> content and oxidative status in human dermal fibroblasts using HMG-CoA reductase inhibitor over a broad range of concentrations. From mitohormesis to mitochondrial dysfunction and accelerated aging. *Aging (Albany NY)*. 2019; 11:2565–82.  
<https://doi.org/10.18632/aging.101926>  
PMID:31076563
10. Kaur A, Macip S, Stover CM. An Appraisal on the Value of Using Nutraceutical Based Senolytics and Senostatics in Aging. *Front Cell Dev Biol*. 2020; 8:218.  
<https://doi.org/10.3389/fcell.2020.00218>  
PMID:32309282
11. Lewinska A, Adamczyk-Grochala J, Bloniarz D, Olszowka J, Kulpa-Greszta M, Litwinienko G, Tomaszewska A, Wnuk M, Pazik R. AMPK-mediated senolytic and senostatic activity of quercetin surface functionalized Fe<sub>3</sub>O<sub>4</sub> nanoparticles during oxidant-induced senescence in human fibroblasts. *Redox Biol*. 2020; 28:101337.  
<https://doi.org/10.1016/j.redox.2019.101337>  
PMID:31622846
12. von Kobbe C. Targeting senescent cells: approaches, opportunities, challenges. *Aging (Albany NY)*. 2019; 11:12844–61.  
<https://doi.org/10.18632/aging.102557>  
PMID:31789602
13. Reiter RJ. Oxidative processes and antioxidative defense mechanisms in the aging brain. *FASEB J*. 1995; 9:526–33.

- <https://doi.org/10.1096/fasebj.9.7.7737461>  
PMID:[7737461](https://pubmed.ncbi.nlm.nih.gov/7737461/)
14. Flor AC, Kron SJ. Lipid-derived reactive aldehydes link oxidative stress to cell senescence. *Cell Death Dis.* 2016; 7:e2366.  
<https://doi.org/10.1038/cddis.2016.275>  
PMID:[27607581](https://pubmed.ncbi.nlm.nih.gov/27607581/)
  15. Gonos ES, Kapetanou M, Sereikaite J, Bartosz G, Naparło K, Grzesik M, Sadowska-Bartosz I. Origin and pathophysiology of protein carbonylation, nitration and chlorination in age-related brain diseases and aging. *Aging (Albany NY).* 2018; 10:868–901.  
<https://doi.org/10.18632/aging.101450>  
PMID:[29779015](https://pubmed.ncbi.nlm.nih.gov/29779015/)
  16. Nyström T. Role of oxidative carbonylation in protein quality control and senescence. *EMBO J.* 2005; 24:1311–17.  
<https://doi.org/10.1038/sj.emboj.7600599>  
PMID:[15775985](https://pubmed.ncbi.nlm.nih.gov/15775985/)
  17. Ni J, Wu Z, Stoka V, Meng J, Hayashi Y, Peters C, Qing H, Turk V, Nakanishi H. Increased expression and altered subcellular distribution of cathepsin B in microglia induce cognitive impairment through oxidative stress and inflammatory response in mice. *Aging Cell.* 2019; 18:e12856.  
<https://doi.org/10.1111/accel.12856> PMID:[30575263](https://pubmed.ncbi.nlm.nih.gov/30575263/)
  18. Lee MY, Wang Y, Vanhoutte PM. Senescence of cultured porcine coronary arterial endothelial cells is associated with accelerated oxidative stress and activation of NFκB. *J Vasc Res.* 2010; 47:287–98.  
<https://doi.org/10.1159/000265563> PMID:[20016203](https://pubmed.ncbi.nlm.nih.gov/20016203/)
  19. Mao D, Hinds PW. p35 is required for CDK5 activation in cellular senescence. *J Biol Chem.* 2010; 285:14671–80.  
<https://doi.org/10.1074/jbc.M109.066118>  
PMID:[20181942](https://pubmed.ncbi.nlm.nih.gov/20181942/)
  20. Gambino V, De Michele G, Venezia O, Migliaccio P, Dall’Olio V, Bernard L, Minardi SP, Della Fazio MA, Bartoli D, Servillo G, Alcalay M, Luzi L, Giorgio M, et al. Oxidative stress activates a specific p53 transcriptional response that regulates cellular senescence and aging. *Aging Cell.* 2013; 12:435–45.  
<https://doi.org/10.1111/accel.12060> PMID:[23448364](https://pubmed.ncbi.nlm.nih.gov/23448364/)
  21. Yasui F, Ishibashi M, Matsugo S, Kojo S, Oomura Y, Sasaki K. Brain lipid hydroperoxide level increases in senescence-accelerated mice at an early age. *Neurosci Lett.* 2003; 350:66–68.  
[https://doi.org/10.1016/s0304-3940\(03\)00827-9](https://doi.org/10.1016/s0304-3940(03)00827-9)  
PMID:[12962918](https://pubmed.ncbi.nlm.nih.gov/12962918/)
  22. Akiguchi I, Pallàs M, Budka H, Akiyama H, Ueno M, Han J, Yagi H, Nishikawa T, Chiba Y, Sugiyama H, Takahashi R, Unno K, Higuchi K, Hosokawa M. SAMP8 mice as a neuropathological model of accelerated brain aging and dementia: Toshio Takeda’s legacy and future directions. *Neuropathology.* 2017; 37:293–305.  
<https://doi.org/10.1111/neup.12373>  
PMID:[28261874](https://pubmed.ncbi.nlm.nih.gov/28261874/)
  23. Tomobe K, Nomura Y. Neurochemistry, neuropathology, and heredity in SAMP8: a mouse model of senescence. *Neurochem Res.* 2009; 34:660–69.  
<https://doi.org/10.1007/s11064-009-9923-x>  
PMID:[19247832](https://pubmed.ncbi.nlm.nih.gov/19247832/)
  24. Lv X, Wang X, Wang Y, Zhou D, Li W, Wilson JX, Chang H, Huang G. Folic acid delays age-related cognitive decline in senescence-accelerated mouse prone 8: alleviating telomere attrition as a potential mechanism. *Aging (Albany NY).* 2019; 11:10356–73.  
<https://doi.org/10.18632/aging.102461>  
PMID:[31757935](https://pubmed.ncbi.nlm.nih.gov/31757935/)
  25. Canudas AM, Gutierrez-Cuesta J, Rodríguez MI, Acuña-Castroviejo D, Sureda FX, Camins A, Pallàs M. Hyperphosphorylation of microtubule-associated protein tau in senescence-accelerated mouse (SAM). *Mech Ageing Dev.* 2005; 126:1300–04.  
<https://doi.org/10.1016/j.mad.2005.07.008>  
PMID:[16171847](https://pubmed.ncbi.nlm.nih.gov/16171847/)
  26. Alvarez-García O, Vega-Naredo I, Sierra V, Caballero B, Tomás-Zapico C, Camins A, García JJ, Pallàs M, Coto-Montes A. Elevated oxidative stress in the brain of senescence-accelerated mice at 5 months of age. *Biogerontology.* 2006; 7:43–52.  
<https://doi.org/10.1007/s10522-005-6041-2>  
PMID:[16518719](https://pubmed.ncbi.nlm.nih.gov/16518719/)
  27. Sureda FX, Gutierrez-Cuesta J, Romeu M, Mulero M, Canudas AM, Camins A, Mallol J, Pallàs M. Changes in oxidative stress parameters and neurodegeneration markers in the brain of the senescence-accelerated mice SAMP-8. *Exp Gerontol.* 2006; 41:360–67.  
<https://doi.org/10.1016/j.exger.2006.01.015>  
PMID:[16542809](https://pubmed.ncbi.nlm.nih.gov/16542809/)
  28. Diaz-Perdigon T, Belloch FB, Ricobaraza A, Elboray EE, Suzuki T, Tordera RM, Puerta E. Early sirtuin 2 inhibition prevents age-related cognitive decline in a senescence-accelerated mouse model. *Neuropsychopharmacology.* 2020; 45:347–57.  
<https://doi.org/10.1038/s41386-019-0503-8>  
PMID:[31471557](https://pubmed.ncbi.nlm.nih.gov/31471557/)
  29. Pallas M, Camins A, Smith MA, Perry G, Lee HG, Casadesus G. From aging to Alzheimer’s disease: unveiling “the switch” with the senescence-accelerated mouse model (SAMP8). *J Alzheimers Dis.* 2008; 15:615–24.  
<https://doi.org/10.3233/jad-2008-15408>  
PMID:[19096160](https://pubmed.ncbi.nlm.nih.gov/19096160/)

30. Zhu WL, Zheng JY, Cai WW, Dai Z, Li BY, Xu TT, Liu HF, Liu XQ, Wei SF, Luo Y, Wang H, Pan HF, Wang Q, Zhang SJ. Ligustilide improves aging-induced memory deficit by regulating mitochondrial related inflammation in SAMP8 mice. *Aging (Albany NY)*. 2020; 12:3175–89. <https://doi.org/10.18632/aging.102793> PMID:32065782
31. Hosokawa M. A higher oxidative status accelerates senescence and aggravates age-dependent disorders in SAMP strains of mice. *Mech Ageing Dev*. 2002; 123:1553–61. [https://doi.org/10.1016/s0047-6374\(02\)00091-x](https://doi.org/10.1016/s0047-6374(02)00091-x) PMID:12470893
32. Butterfield DA, Poon HF. The senescence-accelerated prone mouse (SAMP8): a model of age-related cognitive decline with relevance to alterations of the gene expression and protein abnormalities in Alzheimer's disease. *Exp Gerontol*. 2005; 40:774–83. <https://doi.org/10.1016/j.exger.2005.05.007> PMID:16026957
33. Ben Othman S, Ido K, Masuda R, Gotoh S, Hosoda-Yabe R, Kitaguchi K, Yabe T. Senescence-accelerated mouse prone 8 mice exhibit specific morphological changes in the small intestine during senescence and after pectin supplemented diet. *Exp Gerontol*. 2020; 142:111099. <https://doi.org/10.1016/j.exger.2020.111099> PMID:33011215
34. Sumsuzzman DM, Choi J, Khan ZA, Hong Y. Protective Effects of Melatonin against Severe Burn-Induced Distant Organ Injury: A Systematic Review and Meta-Analysis of Experimental Studies. *Antioxidants (Basel)*. 2020; 9:1196. <https://doi.org/10.3390/antiox9121196> PMID:33261180
35. Hossain MF, Uddin MS, Uddin GM, Sumsuzzman DM, Islam MS, Barreto GE, Mathew B, Ashraf GM. Melatonin in Alzheimer's Disease: A Latent Endogenous Regulator of Neurogenesis to Mitigate Alzheimer's Neuropathology. *Mol Neurobiol*. 2019; 56:8255–76. <https://doi.org/10.1007/s12035-019-01660-3> PMID:31209782
36. Khan ZA, Hong Y, Choi J, Lee Y, Jin Y, Hong Y. Melatonin: A Potent Therapeutic Candidate in Degenerative Neural Damages. *Chronobiology in Medicine*. 2020; 2: 85–95. <https://doi.org/10.33069/cim.2020.0019>
37. Lardone PJ, Alvarez-García O, Carrillo-Vico A, Vega-Naredo I, Caballero B, Guerrero JM, Coto-Montes A. Inverse correlation between endogenous melatonin levels and oxidative damage in some tissues of SAM P8 mice. *J Pineal Res*. 2006; 40:153–57. <https://doi.org/10.1111/j.1600-079X.2005.00289.x> PMID:16441552
38. Öztürk G, Akbulut KG, Güney Ş, Acuna-Castroviejo D. Age-related changes in the rat brain mitochondrial antioxidative enzyme ratios: modulation by melatonin. *Exp Gerontol*. 2012; 47:706–11. <https://doi.org/10.1016/j.exger.2012.06.011> PMID:22796061
39. Morioka N, Okatani Y, Wakatsuki A. Melatonin protects against age-related DNA damage in the brains of female senescence-accelerated mice. *J Pineal Res*. 1999; 27:202–09. <https://doi.org/10.1111/j.1600-079x.1999.tb00616.x> PMID:10551767
40. Okatani Y, Wakatsuki A, Reiter RJ, Miyahara Y. Melatonin reduces oxidative damage of neural lipids and proteins in senescence-accelerated mouse. *Neurobiol Aging*. 2002; 23:639–44. [https://doi.org/10.1016/s0197-4580\(02\)00005-2](https://doi.org/10.1016/s0197-4580(02)00005-2) PMID:12009513
41. Nogués MR, Giralt M, Romeu M, Mulero M, Sánchez-Martos V, Rodríguez E, Acuña-Castroviejo D, Mallol J. Melatonin reduces oxidative stress in erythrocytes and plasma of senescence-accelerated mice. *J Pineal Res*. 2006; 41:142–49. <https://doi.org/10.1111/j.1600-079X.2006.00344.x> PMID:16879320
42. Rodríguez MI, Escames G, López LC, López A, García JA, Ortiz F, Acuña-Castroviejo D. Chronic melatonin treatment reduces the age-dependent inflammatory process in senescence-accelerated mice. *J Pineal Res*. 2007; 42:272–79. <https://doi.org/10.1111/j.1600-079X.2006.00416.x> PMID:17349026
43. Gutierrez-Cuesta J, Sureda FX, Romeu M, Canudas AM, Caballero B, Coto-Montes A, Camins A, Pallàs M. Chronic administration of melatonin reduces cerebral injury biomarkers in SAMP8. *J Pineal Res*. 2007; 42:394–402. <https://doi.org/10.1111/j.1600-079X.2007.00433.x> PMID:17439556
44. Caballero B, Vega-Naredo I, Sierra V, Huidobro-Fernández C, Soria-Valles C, De Gonzalo-Calvo D, Tolvía D, Gutierrez-Cuesta J, Pallas M, Camins A, Rodríguez-Colunga MJ, Coto-Montes A. Favorable effects of a prolonged treatment with melatonin on the level of oxidative damage and neurodegeneration in senescence-accelerated mice. *J Pineal Res*. 2008; 45:302–11. <https://doi.org/10.1111/j.1600-079X.2008.00591.x> PMID:18410310
45. Cheng S, Ma C, Qu H, Fan W, Pang J, He H. Differential effects of melatonin on hippocampal



- neurodegeneration in different aged accelerated senescence prone mouse-8. *Neuro Endocrinol Lett.* 2008; 29:91–99. PMID:[18283264](https://pubmed.ncbi.nlm.nih.gov/18283264/)
46. Gutierrez-Cuesta J, Tajés M, Jiménez A, Coto-Montes A, Camins A, Pallàs M. Evaluation of potential pro-survival pathways regulated by melatonin in a murine senescence model. *J Pineal Res.* 2008; 45:497–505. <https://doi.org/10.1111/j.1600-079X.2008.00626.x> PMID:[18705649](https://pubmed.ncbi.nlm.nih.gov/18705649/)
47. Caballero B, Vega-Naredo I, Sierra V, Huidobro-Fernández C, Soria-Valles C, De Gonzalo-Calvo D, Tolivia D, Pallàs M, Camins A, Rodríguez-Colunga MJ, Coto-Montes A. Melatonin alters cell death processes in response to age-related oxidative stress in the brain of senescence-accelerated mice. *J Pineal Res.* 2009; 46:106–14. <https://doi.org/10.1111/j.1600-079X.2008.00637.x> PMID:[19090913](https://pubmed.ncbi.nlm.nih.gov/19090913/)
48. Carretero M, Escames G, López LC, Venegas C, Dayoub JC, García L, Acuña-Castroviejo D. Long-term melatonin administration protects brain mitochondria from aging. *J Pineal Res.* 2009; 47:192–200. <https://doi.org/10.1111/j.1600-079X.2009.00700.x> PMID:[19573039](https://pubmed.ncbi.nlm.nih.gov/19573039/)
49. García JJ, Piñol-Ripoll G, Martínez-Ballarín E, Fuentes-Broto L, Miana-Mena FJ, Venegas C, Caballero B, Escames G, Coto-Montes A, Acuña-Castroviejo D. Melatonin reduces membrane rigidity and oxidative damage in the brain of SAMP8 mice. *Neurobiol Aging.* 2011; 32:2045–54. <https://doi.org/10.1016/j.neurobiolaging.2009.12.013> PMID:[20096480](https://pubmed.ncbi.nlm.nih.gov/20096480/)
50. Michiels C, Minet E, Mottet D, Raes M. Regulation of gene expression by oxygen: NF-kappaB and HIF-1, two extremes. *Free Radic Biol Med.* 2002; 33:1231–42. [https://doi.org/10.1016/s0891-5849\(02\)01045-6](https://doi.org/10.1016/s0891-5849(02)01045-6) PMID:[12398931](https://pubmed.ncbi.nlm.nih.gov/12398931/)
51. Zou Y, Jung KJ, Kim JW, Yu BP, Chung HY. Alteration of soluble adhesion molecules during aging and their modulation by calorie restriction. *FASEB J.* 2004; 18:320–22. <https://doi.org/10.1096/fj.03-0849fje> PMID:[14688195](https://pubmed.ncbi.nlm.nih.gov/14688195/)
52. Radák Z, Chung HY, Naito H, Takahashi R, Jung KJ, Kim HJ, Goto S. Age-associated increase in oxidative stress and nuclear factor kappaB activation are attenuated in rat liver by regular exercise. *FASEB J.* 2004; 18:749–50. <https://doi.org/10.1096/fj.03-0509fje> PMID:[14766800](https://pubmed.ncbi.nlm.nih.gov/14766800/)
53. Tha KK, Okuma Y, Miyazaki H, Murayama T, Uehara T, Hatakeyama R, Hayashi Y, Nomura Y. Changes in expressions of proinflammatory cytokines IL-1beta, TNF-alpha and IL-6 in the brain of senescence accelerated mouse (SAM) P8. *Brain Res.* 2000; 885:25–31. [https://doi.org/10.1016/s0006-8993\(00\)02883-3](https://doi.org/10.1016/s0006-8993(00)02883-3) PMID:[11121526](https://pubmed.ncbi.nlm.nih.gov/11121526/)
54. Libert S, Chao Y, Chu X, Pletcher SD. Trade-offs between longevity and pathogen resistance in *Drosophila melanogaster* are mediated by NFkappaB signaling. *Aging Cell.* 2006; 5:533–43. <https://doi.org/10.1111/j.1474-9726.2006.00251.x> PMID:[17129215](https://pubmed.ncbi.nlm.nih.gov/17129215/)
55. Frescas D, Roux CM, Aygun-Sunar S, Gleiberman AS, Krasnov P, Kurnasov OV, Strom E, Virtuoso LP, Wrobel M, Osterman AL, Antoch MP, Mett V, Chernova OB, Gudkov AV. Senescent cells expose and secrete an oxidized form of membrane-bound vimentin as revealed by a natural polyreactive antibody. *Proc Natl Acad Sci USA.* 2017; 114:E1668–77. <https://doi.org/10.1073/pnas.1614661114> PMID:[28193858](https://pubmed.ncbi.nlm.nih.gov/28193858/)
56. Smith J. Human Sir2 and the ‘silencing’ of p53 activity. *Trends Cell Biol.* 2002; 12:404–06. [https://doi.org/10.1016/s0962-8924\(02\)02342-5](https://doi.org/10.1016/s0962-8924(02)02342-5) PMID:[12220851](https://pubmed.ncbi.nlm.nih.gov/12220851/)
57. Pallàs M, Pizarro JG, Gutierrez-Cuesta J, Crespo-Biel N, Alvira D, Tajés M, Yeste-Velasco M, Folch J, Canudas AM, Sureda FX, Ferrer I, Camins A. Modulation of SIRT1 expression in different neurodegenerative models and human pathologies. *Neuroscience.* 2008; 154:1388–97. <https://doi.org/10.1016/j.neuroscience.2008.04.065> PMID:[18538940](https://pubmed.ncbi.nlm.nih.gov/18538940/)
58. Lü L, Mak YT, Fang M, Yew DT. The difference in gliosis induced by  $\beta$ -amyloid and Tau treatments in astrocyte cultures derived from senescence accelerated and normal mouse strains. *Biogerontology.* 2009; 10:695–710. <https://doi.org/10.1007/s10522-009-9217-3> PMID:[19221889](https://pubmed.ncbi.nlm.nih.gov/19221889/)
59. Verma AK, Singh S, Rizvi SI. Age-dependent altered redox homeostasis in the chronodisrupted rat model and moderation by melatonin administration. *Chronobiol Int.* 2020; 37:1517–27. <https://doi.org/10.1080/07420528.2020.1792483> PMID:[32731777](https://pubmed.ncbi.nlm.nih.gov/32731777/)
60. Carney JM, Starke-Reed PE, Oliver CN, Landum RW, Cheng MS, Wu JF, Floyd RA. Reversal of age-related increase in brain protein oxidation, decrease in enzyme activity, and loss in temporal and spatial memory by chronic administration of the spin-trapping compound N-tert-butyl-alpha-phenylnitron. *Proc Natl Acad Sci USA.* 1991; 88:3633–36. <https://doi.org/10.1073/pnas.88.9.3633> PMID:[1673789](https://pubmed.ncbi.nlm.nih.gov/1673789/)



61. Aksenova MV, Aksenov MY, Mactutus CF, Booze RM. Cell culture models of oxidative stress and injury in the central nervous system. *Curr Neurovasc Res.* 2005; 2:73–89.  
<https://doi.org/10.2174/1567202052773463>  
PMID:16181101
62. Tütüncüler F, Eskiocak S, Başaran UN, Ekuklu G, Ayvaz S, Vatanserver U. The protective role of melatonin in experimental hypoxic brain damage. *Pediatr Int.* 2005; 47:434–39.  
<https://doi.org/10.1111/j.1442-200x.2005.02085.x>  
PMID:16091083
63. Galano A, Tan DX, Reiter RJ. Melatonin: A Versatile Protector against Oxidative DNA Damage. *Molecules.* 2018; 23:530.  
<https://doi.org/10.3390/molecules23030530>  
PMID:29495460
64. Zhao Z, Lu C, Li T, Wang W, Ye W, Zeng R, Ni L, Lai Z, Wang X, Liu C. The protective effect of melatonin on brain ischemia and reperfusion in rats and humans: *In vivo* assessment and a randomized controlled trial. *J Pineal Res.* 2018; 65:e12521.  
<https://doi.org/10.1111/jpi.12521> PMID:30098076
65. Andriollo-Sanchez M, Hininger-Favier I, Meunier N, Venneria E, O'Connor JM, Maiani G, Coudray C, Roussel AM. Age-related oxidative stress and antioxidant parameters in middle-aged and older European subjects: the ZENITH study. *Eur J Clin Nutr.* 2005 (Suppl 2); 59:S58–62.  
<https://doi.org/10.1038/sj.ejcn.1602300>  
PMID:16254584
66. Zhu Y, Carvey PM, Ling Z. Age-related changes in glutathione and glutathione-related enzymes in rat brain. *Brain Res.* 2006; 1090:35–44.  
<https://doi.org/10.1016/j.brainres.2006.03.063>  
PMID:16647047
67. Alzoubi KH, Mayyas FA, Khabour OF, Bani Salama FM, Alhashimi FH, Mhaidat NM. Chronic Melatonin Treatment Prevents Memory Impairment Induced by Chronic Sleep Deprivation. *Mol Neurobiol.* 2016; 53:3439–47.  
<https://doi.org/10.1007/s12035-015-9286-z>  
PMID:26084441
68. Yoshida M, Yamashita T, Zhao L, Tsuchiya K, Kohda Y, Tonchev AB, Matsuda M, Kominami E. Primate neurons show different vulnerability to transient ischemia and response to cathepsin inhibition. *Acta Neuropathol.* 2002; 104:267–72.  
<https://doi.org/10.1007/s00401-002-0554-4>  
PMID:12172912
69. Reid WA, Valler MJ, Kay J. Immunolocalization of cathepsin D in normal and neoplastic human tissues. *J Clin Pathol.* 1986; 39:1323–30.  
<https://doi.org/10.1136/jcp.39.12.1323>  
PMID:3543065
70. Sundelöf J, Sundström J, Hansson O, Eriksdotter-Jönhagen M, Giedraitis V, Larsson A, Degerman-Gunnarsson M, Ingelsson M, Minthon L, Blennow K, Kilander L, Basun H, Lannfelt L. Higher cathepsin B levels in plasma in Alzheimer's disease compared to healthy controls. *J Alzheimers Dis.* 2010; 22:1223–30.  
<https://doi.org/10.3233/JAD-2010-101023>  
PMID:20930303
71. Matus A, Green GD. Age-related increase in a cathepsin D like protease that degrades brain microtubule-associated proteins. *Biochemistry.* 1987; 26:8083–86.  
<https://doi.org/10.1021/bi00399a010> PMID:3327517
72. Sato Y, Suzuki Y, Ito E, Shimazaki S, Ishida M, Yamamoto T, Yamamoto H, Toda T, Suzuki M, Suzuki A, Endo T. Identification and characterization of an increased glycoprotein in aging: age-associated translocation of cathepsin D. *Mech Ageing Dev.* 2006; 127:771–78.  
<https://doi.org/10.1016/j.mad.2006.07.001>  
PMID:16914181
73. Cataldo AM, Barnett JL, Berman SA, Li J, Quarless S, Bursztajn S, Lippa C, Nixon RA. Gene expression and cellular content of cathepsin D in Alzheimer's disease brain: evidence for early up-regulation of the endosomal-lysosomal system. *Neuron.* 1995; 14:671–80.  
[https://doi.org/10.1016/0896-6273\(95\)90324-0](https://doi.org/10.1016/0896-6273(95)90324-0)  
PMID:7695914
74. Hook V, Yoon M, Mosier C, Ito G, Podvin S, Head BP, Rissman R, O'Donoghue AJ, Hook G. Cathepsin B in neurodegeneration of Alzheimer's disease, traumatic brain injury, and related brain disorders. *Biochim Biophys Acta Proteins Proteom.* 2020; 1868:140428.  
<https://doi.org/10.1016/j.bbapap.2020.140428>  
PMID:32305689
75. Bernal GM, Wahlstrom JS, Crawley CD, Cahill KE, Pytel P, Liang H, Kang S, Weichselbaum RR, Yamini B. Loss of Nfkb1 leads to early onset aging. *Aging (Albany NY).* 2014; 6:931–43.  
<https://doi.org/10.18632/aging.100702>  
PMID:25553648
76. Lasry A, Ben-Neriah Y. Senescence-associated inflammatory responses: aging and cancer perspectives. *Trends Immunol.* 2015; 36:217–28.  
<https://doi.org/10.1016/j.it.2015.02.009>  
PMID:25801910
77. Meng J, Liu Y, Xie Z, Qing H, Lei P, Ni J. Nucleus distribution of cathepsin B in senescent microglia promotes brain aging through degradation of sirtuins. *Neurobiol Aging.* 2020; 96:255–66.

- <https://doi.org/10.1016/j.neurobiolaging.2020.09.001>  
PMID:33049518
78. Fang J, Yan Y, Teng X, Wen X, Li N, Peng S, Liu W, Donadeu FX, Zhao S, Hua J. Melatonin prevents senescence of canine adipose-derived mesenchymal stem cells through activating NRF2 and inhibiting ER stress. *Aging (Albany NY)*. 2018; 10:2954–72.  
<https://doi.org/10.18632/aging.101602>  
PMID:30362962
79. Lee JH, Kim HS, Lee SJ, Kim KT. Stabilization and activation of p53 induced by Cdk5 contributes to neuronal cell death. *J Cell Sci*. 2007; 120:2259–71.  
<https://doi.org/10.1242/jcs.03468> PMID:17591690
80. Wilkaniec A, Czapski GA, Adamczyk A. Cdk5 at crossroads of protein oligomerization in neurodegenerative diseases: facts and hypotheses. *J Neurochem*. 2016; 136:222–33.  
<https://doi.org/10.1111/jnc.13365> PMID:26376455
81. Liu B, Huang B, Liu J, Shi JS. Dendrobium nobile Lindl alkaloid and metformin ameliorate cognitive dysfunction in senescence-accelerated mice via suppression of endoplasmic reticulum stress. *Brain Res*. 2020; 1741:146871.  
<https://doi.org/10.1016/j.brainres.2020.146871>  
PMID:32380088
82. Hemann MT, Lowe SW. The p53-Bcl-2 connection. *Cell Death Differ*. 2006; 13:1256–59.  
<https://doi.org/10.1038/sj.cdd.4401962>  
PMID:16710363
83. Tombor B, Rundell K, Oltvai ZN. Bcl-2 promotes premature senescence induced by oncogenic Ras. *Biochem Biophys Res Commun*. 2003; 303:800–07.  
[https://doi.org/10.1016/s0006-291x\(03\)00402-9](https://doi.org/10.1016/s0006-291x(03)00402-9)  
PMID:12670482
84. Gosselin D, Rivest S. Getting Too Old Too Quickly for Their Job: Senescent Glial Cells Promote Neurodegeneration. *Neuron*. 2018; 100:777–79.  
<https://doi.org/10.1016/j.neuron.2018.11.006>  
PMID:30465763
85. Nelson LE, Valentine RJ, Cacicedo JM, Gauthier MS, Ido Y, Ruderman NB. A novel inverse relationship between metformin-triggered AMPK-SIRT1 signaling and p53 protein abundance in high glucose-exposed HepG2 cells. *Am J Physiol Cell Physiol*. 2012; 303:C4–13.  
<https://doi.org/10.1152/ajpcell.00296.2011>  
PMID:22378745
86. Liu T, Ma X, Ouyang T, Chen H, Lin J, Liu J, Xiao Y, Yu J, Huang Y. SIRT1 reverses senescence via enhancing autophagy and attenuates oxidative stress-induced apoptosis through promoting p53 degradation. *Int J Biol Macromol*. 2018; 117:225–34.  
<https://doi.org/10.1016/j.ijbiomac.2018.05.174>  
PMID:29803744
87. Hesen NA, Riksen NP, Aalders B, Brouwer MA, Ritskes-Hoitinga M, El Messaoudi S, Wever KE. A systematic review and meta-analysis of the protective effects of metformin in experimental myocardial infarction. *PLoS One*. 2017; 12:e0183664.  
<https://doi.org/10.1371/journal.pone.0183664>  
PMID:28832637
88. Hooijmans CR, Geessink FJ, Ritskes-Hoitinga M, Scheffer GJ. A Systematic Review of the Modifying Effect of Anaesthetic Drugs on Metastasis in Animal Models for Cancer. *PLoS One*. 2016; 11:e0156152.  
<https://doi.org/10.1371/journal.pone.0156152>  
PMID:27227779
89. Hooijmans CR, Leenaars M, Ritskes-Hoitinga M. A gold standard publication checklist to improve the quality of animal studies, to fully integrate the Three Rs, and to make systematic reviews more feasible. *Altern Lab Anim*. 2010; 38:167–82.  
<https://doi.org/10.1177/026119291003800208>  
PMID:20507187
90. Kilkeny C, Browne W, Cuthill IC, Emerson M, Altman DG, and NC3Rs Reporting Guidelines Working Group. Animal research: reporting *in vivo* experiments: the ARRIVE guidelines. *Br J Pharmacol*. 2010; 160:1577–79.  
<https://doi.org/10.1111/j.1476-5381.2010.00872.x>  
PMID:20649561
91. Ouzzani M, Hammady H, Fedorowicz Z, Elmagarmid A. Rayyan—a web and mobile app for systematic reviews. *Syst Rev*. 2016; 5:210.  
<https://doi.org/10.1186/s13643-016-0384-4>  
PMID:27919275
92. Hooijmans CR, Rovers MM, de Vries RB, Leenaars M, Ritskes-Hoitinga M, Langendam MW. SYRCLE’s risk of bias tool for animal studies. *BMC Med Res Methodol*. 2014; 14:43.  
<https://doi.org/10.1186/1471-2288-14-43>  
PMID:24667063
93. Higgins JP, Altman DG, Gøtzsche PC, Jüni P, Moher D, Oxman AD, Savovic J, Schulz KF, Weeks L, Sterne JA, Cochrane Bias Methods Group, and Cochrane Statistical Methods Group. The Cochrane Collaboration’s tool for assessing risk of bias in randomised trials. *BMJ*. 2011; 343:d5928.  
<https://doi.org/10.1136/bmj.d5928>  
PMID:22008217
94. 12.6.2 Re-expressing SMDs using rules of thumb for effect sizes. 2021. [https://handbook-5-1.cochrane.org/chapter\\_12/12\\_6\\_2\\_re\\_expressing\\_smds\\_using\\_rules\\_of\\_thumb\\_for\\_effect\\_sizes.htm](https://handbook-5-1.cochrane.org/chapter_12/12_6_2_re_expressing_smds_using_rules_of_thumb_for_effect_sizes.htm)

95. DerSimonian R, Laird N. Meta-analysis in clinical trials. *Control Clin Trials*. 1986; 7:177–88.  
[https://doi.org/10.1016/0197-2456\(86\)90046-2](https://doi.org/10.1016/0197-2456(86)90046-2)  
PMID:[3802833](https://pubmed.ncbi.nlm.nih.gov/3802833/)
96. Patsopoulos NA, Evangelou E, Ioannidis JP. Sensitivity of between-study heterogeneity in meta-analysis: proposed metrics and empirical evaluation. *Int J Epidemiol*. 2008; 37:1148–57.  
<https://doi.org/10.1093/ije/dyn065> PMID:[18424475](https://pubmed.ncbi.nlm.nih.gov/18424475/)
97. Sterne JA, Egger M, Smith GD. Systematic reviews in health care: Investigating and dealing with publication and other biases in meta-analysis. *BMJ*. 2001; 323:101–05.  
<https://doi.org/10.1136/bmj.323.7304.101>  
PMID:[11451790](https://pubmed.ncbi.nlm.nih.gov/11451790/)
98. Egger M, Davey Smith G, Schneider M, Minder C. Bias in meta-analysis detected by a simple, graphical test. *BMJ*. 1997; 315:629–34.  
<https://doi.org/10.1136/bmj.315.7109.629>  
PMID:[9310563](https://pubmed.ncbi.nlm.nih.gov/9310563/)
99. Duval S, Tweedie R. Trim and fill: A simple funnel-plot-based method of testing and adjusting for publication bias in meta-analysis. *Biometrics*. 2000; 56:455–63.  
<https://doi.org/10.1111/j.0006-341x.2000.00455.x>  
PMID:[10877304](https://pubmed.ncbi.nlm.nih.gov/10877304/)

## SUPPLEMENTARY MATERIALS

### Supplementary Figures

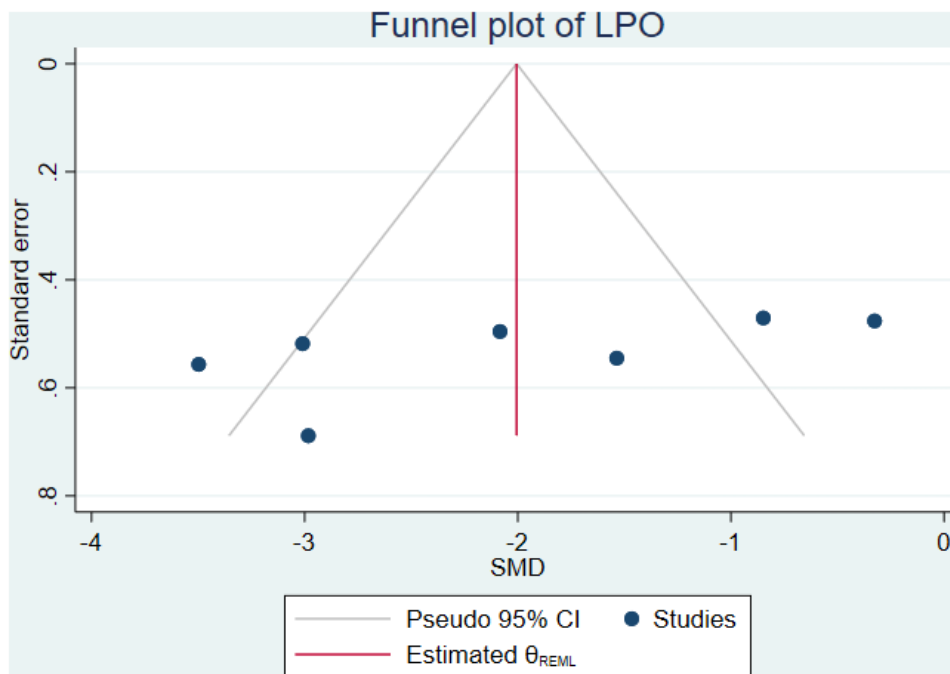

**Supplementary Figure 1.** Symmetric funnel plot in studies reporting the impact of MT on LPO levels. SMD, standardized mean difference; MT, melatonin.

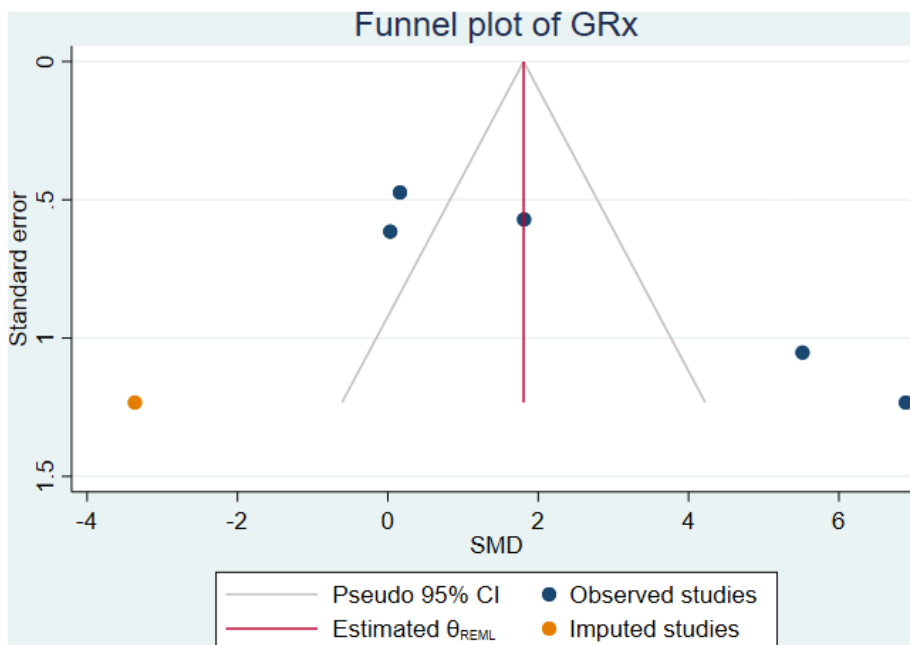

**Supplementary Figure 2.** Asymmetric funnel plot showing the publication bias in studies reporting the impact of MT on GRx levels. SMD, standardized mean difference; MT, melatonin; GRx, glutathione reductase.

## Supplementary Tables

**Supplementary Table 1. Leave-one-out sensitivity analyses on LPO.**

|                           | <b>Pooled SMD [95% CI]</b> | <b>Between-study heterogeneity</b> |
|---------------------------|----------------------------|------------------------------------|
| <b>Overall</b>            | -2.00[-2.91, -1.10]        | $p < 0.0001$ ; $I^2=79\%$          |
| <b>Omitted study</b>      |                            |                                    |
| Carretero M (2009) female | -1.86[-2.85, -0.88]        | $p < 0.0001$ ; $I^2=81\%$          |
| Carretero M (2009) male   | -2.21[-3.20, -1.22]        | $p = 0.0003$ ; $I^2=78\%$          |
| Garcia J (2011)           | -1.99[-3.08, -0.91]        | $p < 0.0001$ ; $I^2=82\%$          |
| Gutierrez-Cuesta J (2007) | -1.75[-2.63, -0.86]        | $p = 0.002$ ; $I^2=74\%$           |
| Nogues MR (2006) female   | -2.08[-3.14, -1.03]        | $p < 0.0001$ ; $I^2=82\%$          |
| Nogues MR (2006) male     | -2.29[-3.13, -1.44]        | $p = 0.005$ ; $I^2=70\%$           |
| Okantani Y (2002)         | -1.83[-2.81, -0.85]        | $p = 0.0003$ ; $I^2=78\%$          |

**Supplementary Table 2. Leave-one-out sensitivity analyses on carbonylated protein.**

|                           | <b>Pooled MD [95% CI]</b> | <b>Between-study heterogeneity</b> |
|---------------------------|---------------------------|------------------------------------|
| <b>Overall</b>            | -5.74[-11.03, -0.44]      | $p < 0.00001$ ; $I^2=93\%$         |
| <b>Omitted study</b>      |                           |                                    |
| Caballero B (2008)        | -6.38[-13.25, 0.48]       | $p < 0.00001$ ; $I^2=95\%$         |
| Garcia JJ (2011)          | -6.40[-13.29, 0.49]       | $p < 0.00001$ ; $I^2=95\%$         |
| Gutierrez-Cuesta J (2007) | -3.00[-4.59, -1.40]       | $p = 0.81$ ; $I^2=0\%$             |
| Okantani Y (2002)         | -6.84[-13.44, -0.24]      | $p < 0.00001$ ; $I^2=92\%$         |

**Supplementary Table 3. Leave-one-out sensitivity analyses on GPx.**

|                           | <b>Pooled SMD [95% CI]</b> | <b>Between-study heterogeneity</b> |
|---------------------------|----------------------------|------------------------------------|
| <b>Overall</b>            | 3.33[1.89, 4.78]           | $p = 0.06$ ; $I^2=65\%$            |
| <b>Omitted study</b>      |                            |                                    |
| Carretero M (2009) female | 3.53[0.91, 6.14]           | $p = 0.02$ ; $I^2=81\%$            |
| Carretero M (2009) male   | 2.61[1.77, 3.46]           | $p = 0.30$ ; $I^2=5\%$             |
| Okantani Y (2002)         | 4.04[2.38, 5.71]           | $p = 0.20$ ; $I^2=40\%$            |

**Supplementary Table 4. Leave-one-out sensitivity analyses on GRx.**

|                           | <b>Pooled SMD [95% CI]</b> | <b>Between-study heterogeneity</b> |
|---------------------------|----------------------------|------------------------------------|
| <b>Overall</b>            | 2.59[0.50, 4.68]           | $p < 0.00001$ ; $I^2=90\%$         |
| <b>Omitted study</b>      |                            |                                    |
| Caballero B (2009)        | 3.35[0.69, 6.00]           | $p < 0.00001$ ; $I^2=91\%$         |
| Carretero M (2009) female | 1.87[-0.13, 3.87]          | $p < 0.0001$ , $I^2=88\%$          |
| Carretero M (2009) male   | 1.65[-0.16, 3.45]          | $p = 0.0001$ , $I^2=86\%$          |
| Nogues MR (2006) female   | 3.35[0.62, 6.09]           | $p < 0.00001$ , $I^2=90\%$         |
| Nogues MR (2006) male     | 2.92[0.01, 5.83]           | $p < 0.00001$ , $I^2=92\%$         |



**Supplementary Table 5. Leave-one-out sensitivity analyses on GSH/GSSH ratio.**

|                           | <b>Pooled MD [95% CI]</b> | <b>Between-study heterogeneity</b> |
|---------------------------|---------------------------|------------------------------------|
| <b>Overall</b>            | 1.12[0.77, 1.47]          | $p = 0.12$ ; $I^2=53\%$            |
| <b>Omitted study</b>      |                           |                                    |
| Carretero M (2009) female | 0.99[0.66, 1.33]          | $p = 0.21$ ; $I^2=36\%$            |
| Carretero M (2009) male   | 1.25[0.93, 1.58]          | $p = 0.24$ ; $I^2=27\%$            |
| Garcia JJ (2011)          | 1.12[0.44, 1.81]          | $p = 0.04$ ; $I^2=76\%$            |

**Supplementary Table 6. PubMed search strategy (01 August 2019).**

| <b>Search</b> | <b>Query</b>                                                                                                                                                                                                                                                                                                                                                                                                                                                                                                                                                                         | <b>Items found</b> |
|---------------|--------------------------------------------------------------------------------------------------------------------------------------------------------------------------------------------------------------------------------------------------------------------------------------------------------------------------------------------------------------------------------------------------------------------------------------------------------------------------------------------------------------------------------------------------------------------------------------|--------------------|
| #1            | ("melatonin"[MeSH Terms] OR "melatonin"[All Fields] OR "n acetyl 5 methoxytryptamine"[All Fields])                                                                                                                                                                                                                                                                                                                                                                                                                                                                                   | 25030              |
| #2            | ((("brain"[MeSH Terms] OR "brain"[All Fields]) AND ("aging"[MeSH Terms] OR "aging"[All Fields] OR "agings"[All Fields] OR "ageing"[All Fields] OR "ageings"[All Fields])) OR ("sensation"[MeSH Terms] OR "sensation"[All Fields] OR "senses"[All Fields]) OR ("geriatrics"[MeSH Terms] OR "geriatrics"[All Fields] OR "geriatric"[All Fields] OR "gerontol"[All Fields])) AND "cellular senescence"[MeSH Terms] OR "cellular senescence"[All Fields])                                                                                                                                | 18,940             |
| #3            | ((("rodentia"[MeSH Terms] OR "rodentia"[All Fields] OR "rodent"[All Fields] OR ("rats"[MeSH Terms] OR "rats"[All Fields] OR "rat"[All Fields]) OR ("mice"[MeSH Terms] OR "mice"[All Fields]) OR ("mice"[MeSH Terms] OR "mice"[All Fields] OR "mouse"[All Fields]) OR ("rats"[MeSH Terms] OR "rats"[All Fields] OR "rattus"[All Fields]) OR "mus"[All Fields]) AND "SAM"[All Fields] OR "samp"[All Fields] OR "SAMP8"[All Fields] OR "SAMP10"[All Fields] OR ("aging"[MeSH Terms] OR "aging"[All Fields] OR "senescence"[All Fields]) AND ("mice"[MeSH Terms] OR "mice"[All Fields])) | 53,179             |
| #4            | #2 OR #3                                                                                                                                                                                                                                                                                                                                                                                                                                                                                                                                                                             | 67,390             |
| #5            | #1 AND #4                                                                                                                                                                                                                                                                                                                                                                                                                                                                                                                                                                            | 303                |

**Supplementary Table 7. Explanations for the full-text article exclusions.**

| SL/NO | Title                                                                                                                                                                                                                                                                                             | Reasons            |
|-------|---------------------------------------------------------------------------------------------------------------------------------------------------------------------------------------------------------------------------------------------------------------------------------------------------|--------------------|
| 1     | Gutierrez-Cuesta J, Tajés M, Jimenez A, Camins A, Pallas M. [Effects of melatonin in the brain of the senescence-accelerated mice-prone 8 (SAMP8) model]. <i>Rev Neurol.</i> 2011; 52: 618–22.                                                                                                    | Review             |
| 2     | Asai M, Ikeda M, Akiyama M, Oshima I, Shibata S. Administration of melatonin in drinking water promotes the phase advance of light-dark cycle in senescence-accelerated mice, SAMR1 but not SAMP8. <i>Brain Res.</i> 2000; 876: 220–4.                                                            | Unrelated outcome  |
| 3     | Lardone PJ, Alvarez-García Ó, Carrillo-Vico A, Vega-Naredo I, Caballero B, Guerrero JM, Coto-Montes A. Inverse correlation between endogenous melatonin levels and oxidative damage in some tissues of SAM P8 mice. <i>Journal of Pineal Research.</i> 2006; 40: 153–7.                           | Wrong study organ  |
| 4     | Rosenfeld SV, Togo EF, Mikheev VS, Popovich IG, Khavinson VK, Anisimov VN. Effect of epthalon on the incidence of chromosome aberrations in senescence-accelerated mice. <i>Bull Exp Biol Med.</i> 2002; 133: 274–6.                                                                              | Wrong study design |
| 5     | Shibata S, Asai M, Oshima I, Ikeda M, Yoshioka T. Melatonin normalizes the re-entrainment of senescence accelerated mice (SAM) to a new light-dark cycle. <i>Adv Exp Med Biol.</i> 1999; 460: 261–70.                                                                                             | Unavailable        |
| 6     | Parisotto EB, Vidal V, García-Cerro S, Lantigua S, Wilhelm Filho D, Sanchez-Barceló EJ, Martínez-Cué C, Rueda N. Chronic Melatonin Administration Reduced Oxidative Damage and Cellular Senescence in the Hippocampus of a Mouse Model of Down Syndrome. <i>Neurochem Res.</i> 2016; 41: 2904–13. | Wrong animal model |
| 7     | Morioka N, Okatani Y, Wakatsuki A. Melatonin protects against age-related DNA damage in the brains of female senescence-accelerated mice. <i>J Pineal Res.</i> 1999; 27: 202–9.                                                                                                                   | Wrong animal model |
| 8     | Cristòfol R, Porquet D, Corpas R, Coto-Montes A, Serret J, Camins A, Pallàs M, Sanfeliu C. Neurons from senescence-accelerated SAMP8 mice are protected against frailty by the sirtuin 1 promoting agents melatonin and resveratrol. <i>J Pineal Res.</i> 2012; 52: 271–81.                       | <i>Ex-vivo</i>     |
