# Supplementary material for: Differential role of melatonin in healthy brain aging: a systematic review and meta-analysis of the SAMP8 model
Source: publisher site journal article supplement (doi:10.18632/aging.202894), 2021-04-02
Supplement: Supplementary file [file aging-v13i7-202894-supplementary-material-SD2.pdf]

## SUPPLEMENTARY TABLES

**Supplementary Table 1. Leave-one-out sensitivity analyses on LPO.**

|                           | <b>Pooled SMD [95% CI]</b> | <b>Between-study heterogeneity</b> |
|---------------------------|----------------------------|------------------------------------|
| <b>Overall</b>            | -2.00[-2.91, -1.10]        | $p < 0.0001$ ; $I^2=79\%$          |
| <b>Omitted study</b>      |                            |                                    |
| Carretero M (2009) female | -1.86[-2.85, -0.88]        | $p < 0.0001$ ; $I^2=81\%$          |
| Carretero M (2009) male   | -2.21[-3.20, -1.22]        | $p = 0.0003$ ; $I^2=78\%$          |
| Garcia J (2011)           | -1.99[-3.08, -0.91]        | $p < 0.0001$ ; $I^2=82\%$          |
| Gutierrez-Cuesta J (2007) | -1.75[-2.63, -0.86]        | $p = 0.002$ ; $I^2=74\%$           |
| Nogues MR (2006) female   | -2.08[-3.14, -1.03]        | $p < 0.0001$ ; $I^2=82\%$          |
| Nogues MR (2006) male     | -2.29[-3.13, -1.44]        | $p = 0.005$ ; $I^2=70\%$           |
| Okantani Y (2002)         | -1.83[-2.81, -0.85]        | $p = 0.0003$ ; $I^2=78\%$          |

**Supplementary Table 2. Leave-one-out sensitivity analyses on carbonylated protein.**

|                           | <b>Pooled MD [95% CI]</b> | <b>Between-study heterogeneity</b> |
|---------------------------|---------------------------|------------------------------------|
| <b>Overall</b>            | -5.74[-11.03, -0.44]      | $p < 0.00001$ ; $I^2=93\%$         |
| <b>Omitted study</b>      |                           |                                    |
| Caballero B (2008)        | -6.38[-13.25, 0.48]       | $p < 0.00001$ ; $I^2=95\%$         |
| Garcia JJ (2011)          | -6.40[-13.29, 0.49]       | $p < 0.00001$ ; $I^2=95\%$         |
| Gutierrez-Cuesta J (2007) | -3.00[-4.59, -1.40]       | $p = 0.81$ ; $I^2=0\%$             |
| Okantani Y (2002)         | -6.84[-13.44, -0.24]      | $p < 0.00001$ ; $I^2=92\%$         |

**Supplementary Table 3. Leave-one-out sensitivity analyses on GPx.**

|                           | <b>Pooled SMD [95% CI]</b> | <b>Between-study heterogeneity</b> |
|---------------------------|----------------------------|------------------------------------|
| <b>Overall</b>            | 3.33[1.89, 4.78]           | $p = 0.06$ ; $I^2=65\%$            |
| <b>Omitted study</b>      |                            |                                    |
| Carretero M (2009) female | 3.53[0.91, 6.14]           | $p = 0.02$ ; $I^2=81\%$            |
| Carretero M (2009) male   | 2.61[1.77, 3.46]           | $p = 0.30$ ; $I^2=5\%$             |
| Okantani Y (2002)         | 4.04[2.38, 5.71]           | $p = 0.20$ ; $I^2=40\%$            |

**Supplementary Table 4. Leave-one-out sensitivity analyses on GRx.**

|                           | <b>Pooled SMD [95% CI]</b> | <b>Between-study heterogeneity</b> |
|---------------------------|----------------------------|------------------------------------|
| <b>Overall</b>            | 2.59[0.50, 4.68]           | $p < 0.00001$ ; $I^2=90\%$         |
| <b>Omitted study</b>      |                            |                                    |
| Caballero B (2009)        | 3.35[0.69, 6.00]           | $p < 0.00001$ ; $I^2=91\%$         |
| Carretero M (2009) female | 1.87[-0.13, 3.87]          | $p < 0.0001$ , $I^2=88\%$          |
| Carretero M (2009) male   | 1.65[-0.16, 3.45]          | $p = 0.0001$ , $I^2=86\%$          |
| Nogues MR (2006) female   | 3.35[0.62, 6.09]           | $p < 0.00001$ , $I^2=90\%$         |
| Nogues MR (2006) male     | 2.92[0.01, 5.83]           | $p < 0.00001$ , $I^2=92\%$         |

**Supplementary Table 5. Leave-one-out sensitivity analyses on GSH/GSSH ratio.**

|                           | <b>Pooled MD [95% CI]</b> | <b>Between-study heterogeneity</b> |
|---------------------------|---------------------------|------------------------------------|
| <b>Overall</b>            | 1.12[0.77, 1.47]          | $p = 0.12$ ; $I^2=53\%$            |
| <b>Omitted study</b>      |                           |                                    |
| Carretero M (2009) female | 0.99[0.66, 1.33]          | $p = 0.21$ ; $I^2=36\%$            |
| Carretero M (2009) male   | 1.25[0.93, 1.58]          | $p = 0.24$ ; $I^2=27\%$            |
| Garcia JJ (2011)          | 1.12[0.44, 1.81]          | $p = 0.04$ ; $I^2=76\%$            |

**Supplementary Table 6. PubMed search strategy (01 August 2019).**

| <b>Search</b> | <b>Query</b>                                                                                                                                                                                                                                                                                                                                                                                                                                                                                                                                                                         | <b>Items found</b> |
|---------------|--------------------------------------------------------------------------------------------------------------------------------------------------------------------------------------------------------------------------------------------------------------------------------------------------------------------------------------------------------------------------------------------------------------------------------------------------------------------------------------------------------------------------------------------------------------------------------------|--------------------|
| #1            | ("melatonin"[MeSH Terms] OR "melatonin"[All Fields] OR "n acetyl 5 methoxytryptamine"[All Fields])                                                                                                                                                                                                                                                                                                                                                                                                                                                                                   | 25030              |
| #2            | ((("brain"[MeSH Terms] OR "brain"[All Fields]) AND ("aging"[MeSH Terms] OR "aging"[All Fields] OR "agings"[All Fields] OR "ageing"[All Fields] OR "ageings"[All Fields])) OR ("sensation"[MeSH Terms] OR "sensation"[All Fields] OR "senses"[All Fields]) OR ("geriatrics"[MeSH Terms] OR "geriatrics"[All Fields] OR "geriatric"[All Fields] OR "gerontol"[All Fields])) AND "cellular senescence"[MeSH Terms] OR "cellular senescence"[All Fields])                                                                                                                                | 18,940             |
| #3            | ((("rodentia"[MeSH Terms] OR "rodentia"[All Fields] OR "rodent"[All Fields] OR ("rats"[MeSH Terms] OR "rats"[All Fields] OR "rat"[All Fields]) OR ("mice"[MeSH Terms] OR "mice"[All Fields]) OR ("mice"[MeSH Terms] OR "mice"[All Fields] OR "mouse"[All Fields]) OR ("rats"[MeSH Terms] OR "rats"[All Fields] OR "rattus"[All Fields]) OR "mus"[All Fields]) AND "SAM"[All Fields] OR "samp"[All Fields] OR "SAMP8"[All Fields] OR "SAMP10"[All Fields] OR ("aging"[MeSH Terms] OR "aging"[All Fields] OR "senescence"[All Fields]) AND ("mice"[MeSH Terms] OR "mice"[All Fields])) | 53,179             |
| #4            | #2 OR #3                                                                                                                                                                                                                                                                                                                                                                                                                                                                                                                                                                             | 67,390             |
| #5            | #1 AND #4                                                                                                                                                                                                                                                                                                                                                                                                                                                                                                                                                                            | 303                |

**Supplementary Table 7. Explanations for the full-text article exclusions.**

| SL/NO | Title                                                                                                                                                                                                                                                                                             | Reasons            |
|-------|---------------------------------------------------------------------------------------------------------------------------------------------------------------------------------------------------------------------------------------------------------------------------------------------------|--------------------|
| 1     | Gutierrez-Cuesta J, Tajés M, Jiménez A, Camins A, Pallas M. [Effects of melatonin in the brain of the senescence-accelerated mice-prone 8 (SAMP8) model]. <i>Rev Neurol.</i> 2011; 52: 618–22.                                                                                                    | Review             |
| 2     | Asai M, Ikeda M, Akiyama M, Oshima I, Shibata S. Administration of melatonin in drinking water promotes the phase advance of light-dark cycle in senescence-accelerated mice, SAMR1 but not SAMP8. <i>Brain Res.</i> 2000; 876: 220–4.                                                            | Unrelated outcome  |
| 3     | Lardone PJ, Alvarez-García Ó, Carrillo-Vico A, Vega-Naredo I, Caballero B, Guerrero JM, Coto-Montes A. Inverse correlation between endogenous melatonin levels and oxidative damage in some tissues of SAM P8 mice. <i>Journal of Pineal Research.</i> 2006; 40: 153–7.                           | Wrong study organ  |
| 4     | Rosenfeld SV, Togo EF, Mikheev VS, Popovich IG, Khavinson VK, Anisimov VN. Effect of epthalon on the incidence of chromosome aberrations in senescence-accelerated mice. <i>Bull Exp Biol Med.</i> 2002; 133: 274–6.                                                                              | Wrong study design |
| 5     | Shibata S, Asai M, Oshima I, Ikeda M, Yoshioka T. Melatonin normalizes the re-entrainment of senescence accelerated mice (SAM) to a new light-dark cycle. <i>Adv Exp Med Biol.</i> 1999; 460: 261–70.                                                                                             | Unavailable        |
| 6     | Parisotto EB, Vidal V, García-Cerro S, Lantigua S, Wilhelm Filho D, Sanchez-Barceló EJ, Martínez-Cué C, Rueda N. Chronic Melatonin Administration Reduced Oxidative Damage and Cellular Senescence in the Hippocampus of a Mouse Model of Down Syndrome. <i>Neurochem Res.</i> 2016; 41: 2904–13. | Wrong animal model |
| 7     | Morioka N, Okatani Y, Wakatsuki A. Melatonin protects against age-related DNA damage in the brains of female senescence-accelerated mice. <i>J Pineal Res.</i> 1999; 27: 202–9.                                                                                                                   | Wrong animal model |
| 8     | Cristòfol R, Porquet D, Corpas R, Coto-Montes A, Serret J, Camins A, Pallàs M, Sanfeliu C. Neurons from senescence-accelerated SAMP8 mice are protected against frailty by the sirtuin 1 promoting agents melatonin and resveratrol. <i>J Pineal Res.</i> 2012; 52: 271–81.                       | <i>Ex-vivo</i>     |
